# Supplementary material for: Short-term morbidity and mortality following radical cystectomy: a systematic review
Source: PubMed Central journal article supplement — BMJ Open. 2021 Apr 14;11(4):e043266. doi: 10.1136/bmjopen-2020-043266 (PMC8054090; doi:10.1136/bmjopen-2020-043266), 2021-04-14
Supplement: bmjopen-2020-043266.draft_revisions.pdf [file bmjopen-2020-043266.draft_revisions.pdf]

# BMJ Open

BMJ Open is committed to open peer review. As part of this commitment we make the peer review history of every article we publish publicly available.

When an article is published we post the peer reviewers' comments and the authors' responses online. We also post the versions of the paper that were used during peer review. These are the versions that the peer review comments apply to.

The versions of the paper that follow are the versions that were submitted during the peer review process. They are not the versions of record or the final published versions. They should not be cited or distributed as the published version of this manuscript.

BMJ Open is an open access journal and the full, final, typeset and author-corrected version of record of the manuscript is available on our site with no access controls, subscription charges or pay-per-view fees (<http://bmjopen.bmj.com>).

If you have any questions on BMJ Open's open peer review process please email [info.bmjopen@bmj.com](mailto:info.bmjopen@bmj.com)

# BMJ Open

## Short term morbidity and mortality following radical cystectomy: a systematic review

|                               |                                                                                                                                                                                                                                                                                                                                                                                                                                                                                                                                                                                                                                                                                                                                           |
|-------------------------------|-------------------------------------------------------------------------------------------------------------------------------------------------------------------------------------------------------------------------------------------------------------------------------------------------------------------------------------------------------------------------------------------------------------------------------------------------------------------------------------------------------------------------------------------------------------------------------------------------------------------------------------------------------------------------------------------------------------------------------------------|
| Journal:                      | <i>BMJ Open</i>                                                                                                                                                                                                                                                                                                                                                                                                                                                                                                                                                                                                                                                                                                                           |
| Manuscript ID                 | bmjopen-2020-043266                                                                                                                                                                                                                                                                                                                                                                                                                                                                                                                                                                                                                                                                                                                       |
| Article Type:                 | Original research                                                                                                                                                                                                                                                                                                                                                                                                                                                                                                                                                                                                                                                                                                                         |
| Date Submitted by the Author: | 29-Jul-2020                                                                                                                                                                                                                                                                                                                                                                                                                                                                                                                                                                                                                                                                                                                               |
| Complete List of Authors:     | Maibom, Sophia; Rigshospitalet, Urological Research Unit, Department of Urology; University of Copenhagen, Faculty of Health and Medical Sciences<br>Joensen, Ulla ; Rigshospitalet, Urological Research Unit, Department of Urology.; University of Copenhagen, Faculty of Health and Medical Sciences<br>Poulsen, Alicia ; Rigshospitalet, Urological Research Unit, Department of Urology<br>Kehlet, Henrik; Rigshopsitalet, Copenhagen University, Section for Surgical Pathophysiology<br>Brasso, Klaus; Rigshospitalet, Urological Research Unit, Department of Urology<br>Røder, Martin Andreas; Rigshospitalet, Urological Research Unit, Department of Urology; University of Copenhagen, Faculty of Health and Medical Sciences |
| Keywords:                     | Bladder disorders < UROLOGY, SURGERY, Urological tumours < UROLOGY                                                                                                                                                                                                                                                                                                                                                                                                                                                                                                                                                                                                                                                                        |
|                               |                                                                                                                                                                                                                                                                                                                                                                                                                                                                                                                                                                                                                                                                                                                                           |

SCHOLARONE™  
Manuscripts

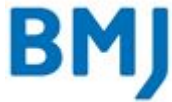

I, the Submitting Author has the right to grant and does grant on behalf of all authors of the Work (as defined in the below author licence), an exclusive licence and/or a non-exclusive licence for contributions from authors who are: i) UK Crown employees; ii) where BMJ has agreed a CC-BY licence shall apply, and/or iii) in accordance with the terms applicable for US Federal Government officers or employees acting as part of their official duties; on a worldwide, perpetual, irrevocable, royalty-free basis to BMJ Publishing Group Ltd ("BMJ") its licensees and where the relevant Journal is co-owned by BMJ to the co-owners of the Journal, to publish the Work in this journal and any other BMJ products and to exploit all rights, as set out in our [licence](#).

The Submitting Author accepts and understands that any supply made under these terms is made by BMJ to the Submitting Author unless you are acting as an employee on behalf of your employer or a postgraduate student of an affiliated institution which is paying any applicable article publishing charge ("APC") for Open Access articles. Where the Submitting Author wishes to make the Work available on an Open Access basis (and intends to pay the relevant APC), the terms of reuse of such Open Access shall be governed by a Creative Commons licence – details of these licences and which [Creative Commons](#) licence will apply to this Work are set out in our licence referred to above.

Other than as permitted in any relevant BMJ Author's Self Archiving Policies, I confirm this Work has not been accepted for publication elsewhere, is not being considered for publication elsewhere and does not duplicate material already published. I confirm all authors consent to publication of this Work and authorise the granting of this licence.

# Short term morbidity and mortality following radical cystectomy: a systematic review

Sophia Liff Maibom<sup>§\*1</sup>, Ulla Nordström Joensen<sup>\*1</sup>, Alicia Martin Poulsen<sup>\*1</sup>, Henrik Kehlet<sup>\*2</sup>, Klaus Brasso<sup>\*1</sup>,  
Martin Andreas Røder<sup>\*1</sup>

<sup>\*1</sup> Urological Research Unit, Department of Urology, Rigshospitalet. Faculty of Health and Medical Sciences, University of Copenhagen, Copenhagen, Denmark.

<sup>\*2</sup> Surgical Pathophysiology Unit, Rigshospitalet, Copenhagen, Denmark

<sup>§</sup>Corresponding author: Sophia Liff Maibom, Urological Research Department 7521, Rigshospitalet, Ole Maaløes Vej 24, 2200 Copenhagen N, Denmark. E-mail: [sophiamaibom@dadlnet.dk](mailto:sophiamaibom@dadlnet.dk)

Word count: 3098

## Abstract

**Objective:** To study short-term (< 90 days) morbidity and mortality following radical cystectomy (RC) for bladder cancer and identify modifiable risk factors associated with these.

**Design:** Systematic review.

**Methods:** The systematic review was conducted according to the Preferred Reporting Items for Systematic Review and Meta-analysis (PRISMA) guidelines. PubMed and EMBASE were searched for relevant papers. Studies reporting complications, reoperations, length of stay, and mortality within 90 days were included. Studies were reviewed according to criteria from the Oxford Centre for Evidence-Based Medicine and the quality of evidence was assessed using the New Castle Ottawa Scale.

**Results:** The search retrieved 1957 articles. Sixty-six articles were included. The quality of evidence was poor to good. Most studies were retrospective, and no randomised clinical trials were identified. Of included studies a median of 6.5 Martin criteria for reporting complications after surgery were fulfilled. The Clavien-Dindo Classification for grading complications was most frequently used. The weighted overall complication rate after RC was 34.9% (range 28.8–68.8) for in house complications, 39.0% (range 27.3–80.0) for 30-day complications, and 58.5% (range 36.1–80.5) for 90-day complications. The most common types of complications reported were gastrointestinal (29.0%) and infectious (26.4%). The weighted mortality rate was 2.4% (range 0.9–4.7) for in house mortality, 2.4% (range 0.3–4.0) for 30-day mortality, and 4.7% (range 0.0–7.0) for 90-day mortality. Age and comorbidity were identified as the best predictors for complications following RC.

**Conclusion:** Short-term morbidity and mortality is high following RC. Reporting of complications is heterogeneous and the quality of evidence is generally low. There is a continuous need for randomised studies to address any intervention that can reduce the morbidity and mortality following RC.

PROSPERO ID: 104937

## Article summary

### Strengths and limitations of this study

- This systematic review can provide as a reference paper for future studies and when measuring quality of care.
- This systematic review emphasizes the continuous need to identify and moderate risk factors for complications and optimize postoperative management plans to reduce both morbidity and mortality associated with radical cystectomy.
- This review is limited by heterogeneity in outcome measures of morbidity with lack of clear definitions of surgical complications making direct comparison between studies difficult.

## INTRODUCTION

Radical cystectomy (RC) with pelvic lymph node dissection and urinary diversion is the preferred treatment for non-metastatic muscle invasive bladder cancer (BC), and for some cases of high-risk non-muscle invasive BC, in patients fit for major surgery (1). RC is a comprehensive procedure that involves surgery to several organ systems and as a result it is associated with a high postoperative morbidity and mortality. Attempts have been made over the years to reduce postoperative complications such as the introduction of Enhanced Recovery After Surgery (ERAS) programs. However, addressing morbidity and mortality associated with RC across surgical cohorts remains important for preoperative counseling, planning of treatment, identification of modifiable risk factors to reduce morbidity and mortality, future clinical trial design, and for assessment of surgical quality. Several measures of morbidity are clinically important such as complication rate, reoperation rate, length of stay (LOS), readmission rate, and mortality. In this paper we conducted a contemporary systematic review of short-term morbidity and mortality following RC for BC.

## METHODS

### Search strategy and study selection

This systematic review was performed in accordance with the Preferred Reporting Items for Systematic Review and Meta-analysis (PRISMA) guidelines (2). A published protocol (PROSPERO ID: 104937) with pre-specified outcomes, inclusion criteria and search strategy is accessible online.

A systematic literature search in PubMed and EMBASE was conducted on 11<sup>th</sup> of June 2019 and re-run on 27<sup>th</sup> of May 2020. A search string was created with the help of an information specialist (Appendix 1).

Articles were screened in a two-stage selection process. In the first stage, two authors (S.L.M. and M.A.R.) reviewed abstracts. All prospective and retrospective studies on short-term (< 90 days) morbidity and mortality after RC were included. Trials with less than 100 participants, indications for cystectomy other than BC, extended procedure (e.g. nephroureterectomy), salvage/palliative cystectomy, organ sparing cystectomy (e.g. partial cystectomy, prostate-sparing cystectomy, vaginal sparing cystectomy, seminal vesicles sparing cystectomy), selected patient group (e.g. certain age groups, women only), feasibility studies, surgical technique-only papers, animal series, and studies not published in English were excluded. Conference papers, case reports, book chapters, review papers, editorials, comments, letters to the editors, and abstracts were also excluded. When in doubt, studies were maintained for further review. In the second stage, full text of all included articles was obtained and read by the same two authors. Agreement was reached through consensus using Covidence Systematic Review software (3). Any disagreement was resolved by discussion and final decision was based on a consensus. In case of duplicate data/study the following criteria were applied in the selection: 1) outcome (studies reporting on complications were prioritized over LOS, mortality), 2) size of the cohort (larger studies were prioritized over smaller studies), 3) methodology (prospective studies were prioritized over retrospective studies and extraction of data from medical/hospital records over record linkage (e.g. ICD-codes in database)), 4) study period (studies with the most recent study period were prioritized).

### Data extraction and quality assessment

The following data was extracted from all studies where possible: first author, data source (e.g. single center, multicenter, database), institution/country of origin, study period, year of publication, number of cases, study design, length of follow up, classification system used for grading complications, use of fast track/ERAS protocol, demographics (age, gender, body mass index (BMI), Charlson Comorbidity Index (CCI),

1  
2  
3  
4  
5  
6  
7  
8  
9  
10  
11  
12  
13  
14  
15  
16  
17  
18  
19  
20  
21  
22  
23  
24  
25  
26  
27  
28  
29  
30  
31  
32  
33  
34  
35  
36  
37  
38  
39  
40  
41  
42  
43  
44  
45  
46  
47  
48  
49  
50  
51  
52  
53  
54  
55  
56  
57  
58  
59  
60

American Society of Anesthesiologists (ASA) score, pT-stage, N-stage, neoadjuvant therapy, previous radiation therapy, prior abdominal/pelvic surgery), outcomes (urinary diversion, number of total complications, complication rate, segregated complications, complication reasons, mortality rate, LOS, reoperations, risk factors for outcomes).

The quality of reporting complications was estimated using the Martin criteria (4). Furthermore, the level of evidence was rated according to criteria from the Oxford Centre for Evidence-Based Medicine (5). The methodological quality of the studies was assessed using the Newcastle-Ottawa Scale (NOS) for observational comparative studies (6).

### **Outcome measures**

The primary outcome was overall complication rate: number of patients with one or more complication(s) within 90 days after RC regardless of classification system used. Secondary outcomes were the following: rate of graded complications according to severity grade utilized; frequencies of types of complications; LOS, reoperation rate; mortality rate; and risk factors for development of outcomes of morbidity (e.g. complications, death, reoperations).

### **Statistical analysis**

Descriptive statistics were used. A weighted average and range were calculated for all rates. A meta-analysis on risk factors for morbidity was not possible due to high heterogeneity of reporting in the multivariate analysis across studies.

### **Patient and public involvement**

No patients were involved in conducting this review.

## **RESULTS**

The literature search retrieved 1957 articles after removing duplicates. Of these 66 studies met the in- and exclusion criteria (7–72). The process is outlined in Figure 1.

### **Characteristics of included studies**

The characteristics of the included studies are summarized in Table 1. Twenty-nine studies (43.9%) were single-center studies and 37 studies (56.1%) were register or multicenter database studies. Most studies (71.2%) were retrospective, retrospective studies of prospectively maintained databases (12.1%) or combined retrospective and prospective studies (4.5%). Only eight (12.1%) were purely prospective surgical series. Patients were operated in the period 1990–2018. Of included studies only two reported that an ERAS protocol was used for the entire cohort (16,48), and in six studies an ERAS protocol was used in a part of the cohort (33,39,42,67,69,72). In the rest of the included studies an ERAS protocol was not used, or the authors did not report on the perioperative care.

Table 1. Summary of patient characteristics.

|                                                        |                        | Number of patients with data available (sum of references) | References                                                                       |
|--------------------------------------------------------|------------------------|------------------------------------------------------------|----------------------------------------------------------------------------------|
| <b>Demographics</b>                                    |                        |                                                            |                                                                                  |
| Percentage of males (weighted average, % (range))      | 80.8% (71.1–99.1)      | 194 769                                                    | (7–14,16–23,25,26,28–36,39,41–52,54–72)                                          |
| Age                                                    |                        |                                                            |                                                                                  |
| - weighted median (range)                              | 69 years (63–73)       | 69 076                                                     | (7,9–11,13,14,16,17,19–22,26,27,29,30,43,45,47,48,50–52,55–58,60,61,63,65,68–72) |
| - weighted mean (range)                                | 68.2 years (56.2–72.1) | 104 373                                                    | (8,12,19,23,29,44,47,48,62,64,70,71)                                             |
| BMI                                                    |                        |                                                            |                                                                                  |
| - weighted median (range)                              | 26.1 (22.3–27.8)       | 10 332                                                     | (9,10,14,16,21,22,26,27,30,35,45,47,48,61,63,65,69,71,72)                        |
| - weighted mean (range)                                | 27.6 (20.4–29.7)       | 13 187                                                     | (8,12,17–19,28,29,44,47,48,54,59,62,64,67,70,71)                                 |
| ASA score (weighted average, % (range))                |                        |                                                            |                                                                                  |
| - I                                                    | 8.0% (0–35.1)          | 15 202                                                     | (10,11,14,19,26,28–31,33,37,42,45,49,53,55,60,63,65,69–71)                       |
| - II                                                   | 39.0% (1.7–81.9)       | 15 435                                                     | (10,11,14,19,26,28–31,33,37,42,45,46,49,53,55,60,63–65,69–71)                    |
| - III                                                  | 54.0% (7.9–94.0)       | 13 490                                                     | (10,14,19,22,26,28–31,33,42,45,46,49,53,55,59,63–65,70,71)                       |
| - IV                                                   | 4.8% (0–16.3)          | 12 287                                                     | (10,14,19,26,28,29,31,33,42,46,49,53,55,59,64,65,70,71)                          |
| CCI (weighted average, % (range))                      |                        |                                                            |                                                                                  |
| - 0                                                    | 45.6% (6.3–68.1)       | 114 334                                                    | (7,16,20,36,42,50,58,60,70)                                                      |
| - 1                                                    | 26.7% (4.0–30.6)       | 85 875                                                     | (16,20,34,36,50,58,60,70)                                                        |
| - ≥2                                                   | 20.9% (2.5–69.4)       | 88 159                                                     | (16,20,22,34,36,48,52,58,60,64,66,70)                                            |
| Prior abdominal surgery (weighted average, % (range))  | 41.4% (5.1–55.1)       | 4 214                                                      | (8,12,16,18,21,29,35,45,61,62,71)                                                |
| Previous radiation (weighted average, % (range))       | 5.5% (1.3–22.1)        | 3 910                                                      | (8,16,18,21,29,33,51,61,62,71)                                                   |
| Neoadjuvant chemotherapy (weighted average, % (range)) | 13.2% (0–50.8)         | 23 678                                                     | (8,10,12,14,16–18,22,25,26,33,35,37,41,45,46,49,53,59,60,62,63,65,68–72)         |
| <b>Perioperative details</b>                           |                        |                                                            |                                                                                  |
| Type of diversion (weighted average, % (range))        |                        |                                                            |                                                                                  |



|                                                             |                      |        |                                                                                                              |
|-------------------------------------------------------------|----------------------|--------|--------------------------------------------------------------------------------------------------------------|
| - ileal conduit                                             | 85.0% (31.4–93.8)    | 80 675 | (8,10–14,16–19,21,22,26,29–31,33,35,36,42–51,53–55,60,61,63–72)                                              |
| - neobladder                                                | 10.5% (2.6–62.1)     | 65 307 | (8,10,12–14,16–19,21,22,26,29–31,33,35,36,42–49,51,53–55,60,61,63–67,69–72)                                  |
| - continent cutaneous diversion                             | 1.25% (0–29.6)       | 59 853 | (8,12–14,16,18,26,29,30,36,43,44,46,48,49,51,54,55,60,61,63,65–67,69,71,72)                                  |
| - ureterocutaneostomy                                       | 1.35% (0–26.7)       | 58 210 | (8,17–19,22,30,31,36,44,47,48,54,60,63,64,66,67,69,72)                                                       |
| - nephrostomy                                               | 0.01% (0–0.5)        | 56 718 | (8,18,19,22,31,36,44,49,51,54,60,63,64,66,67,69,72)                                                          |
| Pathological tumor stage (weighted average, % (range))      |                      |        |                                                                                                              |
| - ≤ T1                                                      | 27.1% (6.4–54.9)     | 31 317 | (10–12,14,15,17–21,25–27,30,31,35,37,42,43,45,46,48,52,54,55,59,60,62–64,71,72)                              |
| - T2                                                        | 29.1% (11.9–56.7)    | 28 916 | (10–12,14,15,17–21,25–27,30,31,35,37,43,45,46,48,49,52,54,55,60,62–64,71)                                    |
| - T3                                                        | 28.5% (10.8–42.4)    | 26 537 | (10,12,14,17–21,25–27,30,31,35,43,46–49,52,54,55,60,62–64,71)                                                |
| - T4                                                        | 13.2% (2.4–25.9)     | 26 537 | (10,12,14,17–21,25–27,30,31,35,43,46–49,52,54,55,60,62–64,71)                                                |
| Lymph node positive disease (weighted average, % (%-range)) | 19.1% (6.3–44.4)     | 29 615 | (10–12,14–16,18–21,25–27,29–31,35,43,45–49,52,54,60,62–64,71,72)                                             |
| LOS                                                         |                      |        |                                                                                                              |
| - weighted median (%-range))                                | 11 days (4–39)       | 77 038 | (7,10,12–14,16,18,20–22,24,26,28,29,31,33,35,39,40,42,43,45,46,48,50,51,53,55,56,58,59,61–63,65,66,69,71,72) |
| - weighted mean (%-range))                                  | 12.5 days (8.2–27.6) | 39 562 | (8,19,25,38,39,44,47,48,50,53,54,58,64,67,68,70)                                                             |

Abbreviations: BMI = Body Mass Index, ASA= American Society of Anesthesiologists, CCI = Charlson Comorbidity Index, LOS= Length of Stay

## Complications

Fifty-two studies reported on short term complications as outlined in table 2. The most frequently reported follow-up period was 90 days. Three studies reporting short term complications did not state the exact follow-up period and were therefore excluded from the complication rate analysis (33,40,67). During the primary hospitalization the overall complication rate was 34.9% (28.8–68.8). The complication rate increased with longer follow-up to 39.0% (27.3–80.0) 30 days, and 58.5% (36.1–80.5) 90 days postoperatively. Minor complications accounted for 40.0% (19.9–77.4) and 38.2% (19.0–80.8) of the

complications reported at 30- and 90-days follow-up, respectively. Major complications after RC occurred in 15.5% (4.9–24.8) and 16.9% (13.4–32.0) of patients after 30 and 90 days, respectively. Rates of complications according to the Clavien-Dindo classification and reoperations are further outlined in Table 2.

Table 2. Complications and re-operations.

| Outcome                                     | Complication rate, weighted average (%-range) | Number of patients with data available (sum of references) | References                                                         |
|---------------------------------------------|-----------------------------------------------|------------------------------------------------------------|--------------------------------------------------------------------|
| In-hospital complication rate               | 34.9%* <sup>1</sup> (28.8–68.8)               | 76171                                                      | (19,32,39,50,58,59,61)                                             |
| 30-day complication rate                    | 39.0%* <sup>2</sup> (27.3–80.0)               | 19160                                                      | (9,18,23,28,30,43,44,46,47,51,53,55,60–62,70–72)                   |
| - CD grade I                                | 9.2% (6.0–16.1)                               | 1291                                                       | (30,35,45,70)                                                      |
| - CD grade II                               | 29.8% (20.6–52.5)                             | 1291                                                       | (30,35,45,70)                                                      |
| - CD grade IIIa+b                           | 6.9% (5.6–14.4)                               | 8749                                                       | (28,30,35,45,70)                                                   |
| - CD grade IVa+b                            | 7.8% (0.7–11.0)                               | 8749                                                       | (28,30,35,45,70)                                                   |
| - CD grade V                                | 1.7% (0.0–2.1)                                | 8982                                                       | (28,30,35,45,46,70)                                                |
| - Minor complication rate* <sup>3</sup> (%) | 40.0% (19.9–77.4)                             | 2536                                                       | (13,18,43,44,51,55,60,62)                                          |
| - Major complication rate* <sup>4</sup>     | 15.5% (4.9–24.8)                              | 4499                                                       | (13,18,30,43,44,46,51,55,60,62,70,72)                              |
| 90-day complication rate                    | 58.5* <sup>5</sup> (36.1–80.5)                | 10625                                                      | (8,10,12,14,16,17,21,22,26,29–31,42,48,49,54,59–61,63–65,69,71,72) |
| - CD grade I                                | 15.0% (4.0–31.6)                              | 4442                                                       | (29,30,54,59,61,64,69)                                             |
| - CD grade II                               | 38.9% (27.0–67.4)                             | 4442                                                       | (29,30,54,59,61,64,69,72)                                          |
| - CD grade IIIa+b                           | 20.5% (8.5–39.2)                              | 5548                                                       | (29–31,54,59,61,64,69,72)                                          |
| - CD grade IVa+b                            | 3.0% (0.2–8.5)                                | 5548                                                       | (29–31,54,59,61,64,69,72)                                          |
| - CD grade V                                | 3.5% (0.1–3.9)                                | 55440                                                      | (29–31,36,48,54,59,61,64,69,72)                                    |
| - Minor complication rate* <sup>3</sup>     | 38.2% (19.0–80.8)                             | 56955                                                      | (8,12,16,17,21,26,31,36,42,59–61,63,69)                            |
| - Major complication rate* <sup>4</sup>     | 16.9% (13.4–32.0)                             | 59068                                                      | (8,12,14,16,17,22,26,29–31,36,42,49,59–61,64,69,72)                |
| Reoperation rate                            |                                               |                                                            |                                                                    |
| - 30-day                                    | 5.8% (3.0–8.7)                                | 11598                                                      | (9,21,27,28,30,44–46,53,62,71)                                     |
| - 90-day                                    | 12.3% (9.3–18.9)                              | 1533                                                       | (10,26,30,54,69)                                                   |

\*<sup>1</sup>one study (25) did not report on overall complication rate, \*<sup>2</sup>Three studies (13,35,45) did not report on overall complication rate. \*<sup>3</sup> minor complications defined as Clavien-Dindo grade I–II, MSKCC grade 1–2 or minor complications. \*<sup>4</sup> major complications defined as Clavien-Dindo grade III–V, MSKCC grade 3–5 or major complications. \*<sup>5</sup> one study (36) did not report overall complication rate.

Thirty-four studies (8,10,12,14,16,18,19,22,26,28–31,33,35,36,42,45,46,48,49,54,55,59–64,67,69–72) classified complications according to the Clavien-Dindo classification (73), six (9,13,17,43,44,51) studies

classified complications as minor and major complications, three studies (21,27,72) used the Memorial Sloan Kettering Cancer Centre modified Clavien-Dindo classification (61), one study (65) used Common Terminology Criteria for Adverse Events (74), and nine studies (23,25,32,39,40,47,50,53,58) did not use any system for grading complications.

### Type of complications

Twenty-one studies reported on types of 90-day complications (Table 3). Gastrointestinal (GI) (29.0%) and infectious (26.4%) complications were the most frequent.

Table 3. Categories and type of 90-day complications.

| Category/type                   | Rate, weighted average (%-range) | Number of patients with data available (sum of references) | References                                |
|---------------------------------|----------------------------------|------------------------------------------------------------|-------------------------------------------|
| Gastrointestinal                | 29.0% (6.7–42.7)                 | 6188                                                       | (10,15,16,20,21,24,42,43,48,53,55,63)     |
| - Ileus                         | 16.5% (3.8–33.7)                 | 5073                                                       | (6,8,15,16,24,25,36,42,43,48,55,58,59,63) |
| - Small bowel obstruction       | 4.6% (1.7–9.0)                   | 3193                                                       | (8,15,20,25,42,43,48,55,58,59)            |
| - Constipation                  | 3.3% (0.5–11.4)                  | 2491                                                       | (6,8,16,42,43,55)                         |
| - Clostridium Difficile colitis | 2.3% (0.7–3.8)                   | 2574                                                       | (15,43,55,58,63)                          |
| - Diarrhea                      | 1.7% (0.6–5.6)                   | 2392                                                       | (6,16,42,43,48,55)                        |
| - Anastomotic bowel leak        | 1.1% (0.3–1.9)                   | 3254                                                       | (6,15,16,20,55,63)                        |
| - Gastrointestinal bleeding     | 1.0% (0.3–1.3)                   | 2757                                                       | (6,15,16,55,63)                           |
| Infectious                      | 26.4% (10.9–46.2)                | 5270                                                       | (8,10,15,16,20,21,24,42,43,48,55,63)      |
| - UTI/pyelonephritis            | 14.1% (1.1–29.7)                 | 4297                                                       | (6,15,16,20,36,42,43,48,55,58,59,63)      |
| - Sepsis                        | 4.2% (1.5–8.5)                   | 3812                                                       | (15,16,20,36,42,43,48,55,59,63)           |
| - Fever of unknown origin       | 3.1% (0.6–4.8)                   | 2966                                                       | (6,15,16,43,55,63)                        |
| - Pelvic/intraabdominal abscess | 2.4% (0.1–4.3)                   | 2836                                                       | (15,16,42,55,59,63)                       |
| Genitourinary                   | 16.0% (6.0–23.5)                 | 5697                                                       | (11,15,16,21,24,48,53,55,63)              |
| - Ureter stenosis               | 3.2% (1.7–7.0)                   | 2539                                                       | (6,15,16,20,42,55,59)                     |
| - Ureter leakage                | 3.1% (0.4–5.3)                   | 4282                                                       | (6,8,15,16,20,42,43,55,58,59,63)          |
| Wound                           | 13.1% (5.6–27.0)                 | 6424                                                       | (6,10,11,15,16,20,21,24,42,53,58,63)      |
| - Dehiscence                    | 4.0% (1.3–4.9)                   | 2722                                                       | (20,25,43,55,63)                          |
| - Fascial dehiscence            | 1.6% (0.4–3.5)                   | 2139                                                       | (6,15,48,55,59)                           |
| - Infection                     | 10.5% (2.4–19.3)                 | 3827                                                       | (8,15,20,25,36,43,48,55,63)               |
| Cardiac                         | 6.1% (0.6–16.9)                  | 5366                                                       | (6,10,11,15,24,42,43,53,55,58,63)         |
| - Myocardial infarction         | 1.1% (0.2–3.5)                   | 4170                                                       | (6,8,15,20,42,43,48,55,59,63)             |
| - Arrhythmia                    | 4.2% (0.2–14.4)                  | 2923                                                       | (6,15,42,43,55,63)                        |
| Bleeding                        | 3.5% (0.5–17.8)                  | 2814                                                       | (10,24,55,58,63)                          |
| - Hematoma                      | 0.9% (0.7–1.2)                   | 1096                                                       | (6,8,59)                                  |
| - Transfusion                   | 23.2% (8.1–45.3)                 | 2606                                                       | (6,8,25,42,48,55,58)                      |
| Respiratory                     | 5.0% (1.3–11.5)                  | 6845                                                       | (6,8,10,11,15,21,24,42,43,48,53,55,63)    |

|                |                |      |                                        |
|----------------|----------------|------|----------------------------------------|
| - Pneumonia    | 2.8% (0.6–5.9) | 3639 | (6,15,20,25,36,42,48,55,63)            |
| Thromboembolic | 3.6% (0.2–8.1) | 4933 | (6,8,10,15,20,24,25,42,43,48,55,59,63) |
| Neurological   | 2.8% (0.6–7.7) | 4557 | (6,10,11,15,21,42,43,48,55,63)         |
| Renal failure  | 2.3% (0.5–6.7) | 4070 | (6,8,15,16,42,43,55,59,63)             |
| Other          |                |      |                                        |
| - Fistula      | 1.1% (0.6–1.4) | 1560 | (6,15,20,42,43,58,59)                  |
| - Lymphocele   | 2.1% (1.3–4.7) | 3381 | (6,8,15,20,42,43,48,55,58,59)          |

UTI: urinary tract infection

## Mortality

Fifty-three studies were included in the mortality analysis (Table 4). The weighted average for the in-hospital mortality rate was 2.4% (0.9–4.7), the 30-day mortality rate 2.4% (0.3–4.0) and the 90-day mortality rate 4.7% (0.0–7.0).

Table 4. In-hospital, 30-day, and 90-day mortality.

|                       | Mortality rate, weighted average (%-range) | Number of patients with data available (sum of references) | References                                                                          |
|-----------------------|--------------------------------------------|------------------------------------------------------------|-------------------------------------------------------------------------------------|
| In-hospital mortality | 2.4% (0.9–4.7)                             | 87848                                                      | (26,35,44,50,52,55,60)                                                              |
| 30-day mortality      | 2.4% (0.3–4.0)                             | 61798                                                      | (1–3,7–9,14,18,22,24,27,29,31,32,35,37–40,45,46,51,54–56,63–66)                     |
| 90-day mortality      | 4.7% (0.0–7.0)                             | 107702                                                     | (1,2,4–6,8,10,11,14–16,18,20,23–25,27,30–32,35,42,43,48,50,53–56,58,59,61–63,65,66) |

## Quality of studies

Only four of the included studies (12,21,22,61) met 10 of 10 Martin criteria (Appendix 2). The median number of fulfilled Martin criteria was 6.5 (range 2–10). The only criterion fulfilled by all studies was defining the method of accruing data. The level of evidence according to criteria from the Oxford Centre for Evidence-Based Medicine was rated as 3 or 4. The methodological quality across studies was “poor” to “good” assessed using the NOS (Appendix 2).

## DISCUSSION

We systematically reviewed the literature to accurately describe short-term morbidity and mortality following RC and identify modifiable risk factors associated with these. The aim was to identify factors that could form the basis for design of future randomised trials on postoperative interventions that can reduce the risk of complications.

1  
2  
3  
4 RC is an extensive urological procedure and associated with a high risk of short-term minor and major  
5 morbidity. Mortality within 90-days of primary surgery is not negligible and occurs in 4.7% according to our  
6 review. Our systematic review underlines that complications occur in 1 in 3 patients during hospitalization  
7 and that 1 in 5 patients have major complications during the first 30 days after RC. This emphasizes the  
8 continuous need to identify and moderate risk factors for complications and optimize postoperative  
9 management plans to reduce both morbidity and mortality associated with RC.  
10  
11

12  
13 Our analysis identified GI and infectious complications as the most frequently reported complications after  
14 RC. Overall, GI complications occurred in 29.0% with a postoperative ileus rate of 15.6%. Urinary tract  
15 infections (UTI) were the most frequently occurring infectious complications occurring in 14.1% of patients.  
16

17  
18 Based on the literature reviewed, it was not possible to identify the most important risk factors for GI  
19 complications and thus define whether these were potentially modifiable. The risk of ileus, which is often  
20 most clinically relevant, seems to be affected by many factors, most importantly increasing age. One study  
21 reported increasing age a statistically significant risk factor for ileus with an odds ratio (OR) of 1.30 (95% CI  
22 1.1–1.5) per 10-year increase of age (23). This finding is supported by a large retrospective study of 41 498  
23 patients that found an increased OR of developing ileus with per one year increment in age (OR 1.012, 95%  
24 CI 1.009–1.014,  $p < 0.05$ ) (75). The study also found that the risk of ileus increased with several chronic  
25 conditions such as chronic pulmonary and neurological disease. This underlines that reducing GI  
26 complication rates relies primarily on an overall medical assessment and that alternative treatment options  
27 should be considered in medically ill patients. Surgeons performing RC must be aware that poor general  
28 health status increases the risk of GI complications and entails a poor short-term outcome. Several studies  
29 of RC have promoted the implementation of ERAS protocols, which originate from colorectal surgery where  
30 ERAS reduces GI complications. However, there is limited evidence for ERAS in an RC setting (76). Only the  
31 use of postoperative gum-chewing, the use of Alvimopan (a peripherally acting  $\mu$ -opioid receptor  
32 antagonist currently not available in Europe) and controlled administration of perioperative fluid  
33 management (goal directed fluid therapy) to avoid both fluid excess and hypovolemia have been shown to  
34 reduce GI complications after RC in randomised clinical trials (RCT) (77–79). Comparative studies indicate  
35 that omitting the nasogastric tube and mechanical bowel preparation result in lower GI complications after  
36 RC (80,81). ERAS offers good practical guidelines, but the various elements such as early mobilization,  
37 omitting pelvic drainage, perioperative body temperature monitoring, and early oral diet are not studied  
38 individually but introduced in different modified versions with several components used together.  
39 Consequently, it is difficult to derive which factor has the largest impact on reducing GI complications.  
40 Meta-analysis of ERAS protocols versus traditional protocols have found a faster return of bowel function  
41 and lower overall complication rate in the group managed on an ERAS compared to a standard of care  
42 protocol, but the overall level of evidence in RC remains low with regard to ERAS implementation (82,83). A  
43 previous study described that only 20% of surgeons that endorse ERAS guidelines actually practiced all  
44 interventions recommended by the ERAS society (84).  
45  
46  
47  
48  
49  
50  
51  
52

53 The anatomical reconstruction of the urinary tract with the use of bowel as urinary diversion following RC  
54 will naturally increase the risk of UTI, which can prolong LOS and is leading to re-admittance. Only three of  
55 the included studies identified multivariable risk factors that were statistically significant predictors of  
56 infectious complications 30 and 90 days after RC (23,28,49). Two studies found that continent reservoirs  
57 were associated with a higher risk of UTI compared to ileal conduits. Johnson et al. found that any  
58  
59  
60

continent urinary diversion increased the risk of infectious complications compared to an incontinent urinary diversion (OR 1.68,  $p < 0.001$ ) (28). Nazmy et al. found that an Indiana pouch increased risk of UTI compared to ileal conduit (OR 3.55, 95% CI 1.33–9.44,  $p = 0.01$ ), however an orthotopic bladder substitute did not increase the risk of UTI compared to an ileal conduit (49). Other studies investigating this association have shown conflicting results (85–88). Hollenbeck et al. found preoperative bleeding disorder, poor functional status, preoperative acute renal failure, and a  $>10\%$  weight loss preoperatively to be associated with an increased risk of UTI (23). In general, the comorbid patient may be at the highest risk for UTI. A large retrospective study of 1133 patients found that a CCI  $> 2$  was associated with a higher 90-day postoperative UTI rate (OR = 1.8, 95% CI 1.1–2.9,  $p = 0.05$ ) compared to a CCI 0–2 (85). It remains unclear if UTI can be prevented. Pariser et al. demonstrated that a change in prophylactic antibiotic protocol from a narrow to a broader coverage did not reduce the UTI rate, although the 30-day risk of overall infectious complications was reduced following RC from 41% to 30% ( $p = 0.043$ ) (89). A population-based American study reported a lower infectious event rate when using a combination of antibiotic prophylaxis compared to a single agent antibiotic (OR 0.79, 95% CI 0.70–0.89,  $p < 0.001$ ) (90). The authors also investigated if extended antibiotic treatment  $> 24$  h after RC decreased the risk of infectious complications, but no such association was found. Currently, international guidelines recommend that broad-spectrum antibiotics are used in the prophylactic regimen considering the local microbiological environment (91,92). However, RCTs addressing antibiotic prophylaxis regarding type, timing and duration for the risk of UTI are lacking and warranted.

Infectious and GI complications also account for the largest share of major complications (10,61,69). A recent study on reoperations in a cohort of 10 848 patients found that 60% of reoperations occurring within 30 days after RC were of gastrointestinal origin (93). The study also demonstrated that a reoperation within 30 days increased the short-term mortality (6.6% vs. 1.6%,  $p < 0.01$ ) compared to no reoperation. In several studies patient related factors, age and comorbidity, were identified as the most important factors for mortality at index hospitalization, as well as 30- and 90 days following surgery (11,17,24,27,32,38,41,52,66,68).

In addition to patient-related factors, the impact of hospital volume, surgical experience, and surgical technique has been addressed. A meta-analysis of seven studies found that the risk of postoperative mortality after RC was decreased by 45% when performed at a high-volume center compared to a low volume center (pooled estimated effect OR 0.55 (95% CI 0.44–0.69)) (94). Two studies found a significant decreased post-operative mortality when performed by high-volume surgeons (OR 0.55, 95% CI 0.41–0.73 and OR 0.64, 95% CI 0.44–0.91). Studies also show that complications are reduced with both increasing hospital and surgeon volume (32,36,95,96). Unfortunately, the distinction between low- vs high-volume is not well-defined and thus not clearly comparable between studies. The European Association of Urology (EAU) Muscle-invasive and Metastatic Bladder Cancer Guideline Panel recommends RC to be performed at centers with at least 10 RC/year and preferably  $>20$  RC/year (97). The surgical technique has been investigated in 12 of the included studies in this review (18,20,29,31,33,35,45,48,62,64). Open RC was compared to robotic-assisted RC in ten of these non-randomised papers. In seven of these publications, a significantly reduced complication rate was found. However, four RCTs comparing open and robotic surgery (not included in the review) did not find a difference in complication rates (98–102). All RCTs have been conducted with extracorporeal urinary diversion performed and it is speculated that robot-assisted RC with

1  
2  
3  
4  
5  
6  
7  
8  
9  
10  
11  
12  
13  
14  
15  
16  
17  
18  
19  
20  
21  
22  
23  
24  
25  
26  
27  
28  
29  
30  
31  
32  
33  
34  
35  
36  
37  
38  
39  
40  
41  
42  
43  
44  
45  
46  
47  
48  
49  
50  
51  
52  
53  
54  
55  
56  
57  
58  
59  
60

intracorporeal urinary diversion may have a lower complication rate compared to open RC. The question in hand is currently being studied in the ongoing iROC trial (103).

There are limitations of this review that must be addressed. Most of the included studies were retrospective which limits the clinical utility. It is important to notice that we excluded studies with less than 100 patients and studies investigating subgroups of patients such as certain age groups, types of urinary diversion or T-stages of BC. Since most RCTs on RC have less than 100 participants and often exclude patients with certain characteristics they were not included in this review.

The difficulties of comparing RC studies are manifold. Firstly, selection bias between cohorts must be expected. This is reflected by the wide range for the estimates of the weighted averages for ASA score and CCI (Table 1). The selection of patients fit for RC is known to be associated with great variation among centers (104). Secondly, there was no standardized reporting of complications. Most used different classification systems for severity grade of complications with the Clavien-Dindo classification being the most frequent. Thirdly, even when using a grading system as Clavien-Dindo with certain criteria, the scale can be interpreted differently or modified in some way. For example, some studies do not calculate blood transfusions as a complication even though it could be argued to be a grade II complication. Fourthly, measures of morbidity can be defined differently across studies. For example, ileus is reported in up to 20% of patients undergoing RC. However, the reporting of ileus may be questioned as a previous systematic review found that ileus was defined differently across studies, and in the majority of included studies it was not defined at all (105). There is an increased focus on more uniform reporting of morbidity following RC and the EAU have proposed authors to use quality criteria originally proposed by Martin et al. (4,106). In the present review only four studies fulfilled all the Martin criteria. A previous non-systematic review from 2007 found no study reporting on complications after RC fulfilling all the Martin criteria. Lastly, publication bias must be emphasized as an important limitation.

We refrained from a meta-analysis of predictors of morbidity and mortality in this review as the number of studies investigating the same risk variable and outcome were too small for an analysis. Identifying clinical predictors may aid to the prevention of postoperative morbidity and mortality. Currently there is no risk-assessment tool to predict postoperative outcomes after RC, and little correlation is found between the most frequently used risk-scoring systems (e.g. CCI and ASA score) and postoperative outcomes (70). Nevertheless, in the included studies of this review, comorbidity was in multivariate logistic regression analysis consistently associated with a significantly increased OR of both complications (12,17,22,23,32,49,51,58,60,61,72) and mortality (11,17,24,32,41,52,66). Surprisingly, there is a paucity of prospective studies studying the subjects of the most common complications after RC in order to identify clinical predictors of these. Furthermore, prospective randomised studies comparing different interventions/regimens are lacking.

## CONCLUSION

This review shows that RC is associated with high risk of morbidity and mortality. However, with thorough patient selection, experienced surgeons, treatment at a high-volume hospital and the implementation of an

1  
2  
3  
4 ERAS protocol morbidity and mortality can likely be reduced. Trials addressing medical or surgical  
5 interventions to reduce short-term complication are needed.  
6  
7  
8  
9

## 10 FUNDING

11 This work was supported by the Department of Urology, Rigshospitalet and Rigshospitalet's Research  
12 Committee. Rigshospitalet's Research Committee did not have any role in the design, the analyses, the  
13 interpretation of data, or in the decision to submit results.  
14  
15

## 16 COMPETING INTERESTS

17 None declared.  
18  
19

## 20 AUTHORS CONTRIBUTIONS

21 All authors contributed to the research idea and the question. S.L.M., U.N.J., and M.A.R. wrote the  
22 protocol. S.L.M. and M.A.R. screened all abstracts and full texts for inclusion. S.L.M. did all the data  
23 extraction and the statistics. S.L.M. drafted the manuscript and all authors contributed to the editing of the  
24 manuscript and approved the final manuscript.  
25  
26  
27  
28

## 29 REFERENCES

- 30  
31 1. Alfred Witjes J, Lebet T, Compérat EM, et al. Updated 2016 EAU Guidelines on Muscle-invasive and  
32 Metastatic Bladder Cancer. *Eur Urol*. 2017 Mar;71(3):462–75.
- 33  
34 2. Moher D, Shamseer L, Clarke M, et al. Preferred reporting items for systematic review and meta-  
35 analysis protocols (PRISMA-P) 2015 statement. *Syst Rev*. 2015 Jan 1;4(1):1.
- 36  
37 3. Covidence Systematic Review Software [Internet]. Veritas Health Innovation Ltd, Melbourne,  
38 Australia. Available from: [www.covidence.org](http://www.covidence.org)
- 39  
40 4. Martin RCG, Brennan MF, Jaques DP. Quality of complication reporting in the surgical literature. *Ann*  
41 *Surg*. 2002 Jun;235(6):803–13.
- 42  
43 5. Howick J, Chalmers I, Glasziou P, et al. OCEBM Levels of Evidence Working Group. "The Oxford 2011  
44 Levels of Evidence". Oxford Centre for Evidence-Based Medicine. [Internet]. Available from:  
45 <http://www.cebm.net/index.aspx?o=5653>
- 46  
47 6. Wells G, Shea B, O'Connell D, et al. The Newcastle-Ottawa Scale (NOS) for assessing the quality of  
48 nonrandomised studies in meta-analyses [Internet]. [cited 2020 May 6]. Available from:  
49 [http://www.ohri.ca/programs/clinical\\_epidemiology/oxford.asp](http://www.ohri.ca/programs/clinical_epidemiology/oxford.asp)
- 50  
51 7. Afshar M, Goodfellow H, Jackson-Spence F, et al. Centralisation of radical cystectomies for bladder  
52 cancer in England, a decade on from the "Improving Outcomes Guidance": the case for super  
53 centralisation. *BJU Int*. 2018 Feb;121(2):217–24.
- 54  
55 8. Al-Daghmin A, Kauffman EC, Shi Y, et al. Efficacy of robot-assisted radical cystectomy (RARC) in  
56 advanced bladder cancer: results from the International Radical Cystectomy Consortium (IRCC). *BJU*  
57 *Int*. 2014 Jul;114(1):98–103.  
58  
59  
60



1  
2  
3  
4  
5  
6  
7  
8  
9  
10  
11  
12  
13  
14  
15  
16  
17  
18  
19  
20  
21  
22  
23  
24  
25  
26  
27  
28  
29  
30  
31  
32  
33  
34  
35  
36  
37  
38  
39  
40  
41  
42  
43  
44  
45  
46  
47  
48  
49  
50  
51  
52  
53  
54  
55  
56  
57  
58  
59  
60

9. Arora K, Hanson KT, Habermann EB, et al. Early Complications and Mortality following Radical Cystectomy: Associations with Malnutrition and Obesity. *Bl cancer* (Amsterdam, Netherlands). 2018 Oct;4(4):377–88.
10. Björnsson O, Gudmundsson EO, Marteinsonn VT, et al. Radical cystectomy in the treatment of bladder cancer in Iceland: A population-based study. *Scand J Urol*. 2016 Jan 2;50(1):65–70.
11. Boorjian SA, Kim SP, Tollefson MK, et al. Comparative performance of comorbidity indices for estimating perioperative and 5-year all cause mortality following radical cystectomy for bladder cancer. *J Urol*. 2013 Jul;190(1):55–60.
12. Cantiello F, Cicione A, Autorino R, et al. Metabolic Syndrome, Obesity, and Radical Cystectomy Complications: A Clavien Classification System-Based Analysis. *Clin Genitourin Cancer*. 2014 Oct;12(5):384–93.
13. Chang SS, Cookson MS, Baumgartner RG, et al. Analysis of early complications after radical cystectomy: results of a collaborative care pathway. *J Urol*. 2002 May;167(5):2012–6.
14. De Nunzio C, Cindolo L, Leonardo C, et al. Analysis of radical cystectomy and urinary diversion complications with the Clavien classification system in an Italian real life cohort. *Eur J Surg Oncol*. 2013 Jul;39(7):792–8.
15. de Vries RR, Visser O, Nieuwenhuijzen JA, et al. Outcome of treatment of bladder cancer: a comparison between low-volume hospitals and an oncology centre. *World J Urol*. 2010 Aug;28(4):431–7.
16. Djaladat H, Katebian B, Bazargani ST, et al. 90-Day complication rate in patients undergoing radical cystectomy with enhanced recovery protocol: a prospective cohort study. *World J Urol*. 2017 Jun 12;35(6):907–11.
17. Fairey A, Chetner M, Metcalfe J, et al. Associations Among Age, Comorbidity and Clinical Outcomes After Radical Cystectomy: Results From the Alberta Urology Institute Radical Cystectomy Database. *J Urol*. 2008 Jul;180(1):128–34.
18. Flamiatos JF, Chen Y, Lambert WE, et al. Open versus robot-assisted radical cystectomy: 30-day perioperative comparison and predictors for cost-to-patient, complication, and readmission. *J Robot Surg*. 2019 Feb;13(1):129–40.
19. Gschliesser T, Eredics K, Berger I, et al. The Impact of Gender on Tumour Stage in In-House Complications and Choice of Urinary Diversion: Results of the Austrian Cystectomy Registry. *Urol Int*. 2017;99(4):429–35.
20. Hanna N, Leow JJ, Sun M, et al. Comparative effectiveness of robot-assisted vs. open radical cystectomy. *Urol Oncol*. 2018 Mar;36(3):88.e1-88.e9.
21. Hayn MH, Hellenthal NJ, Hussain A, et al. Defining Morbidity of Robot-Assisted Radical Cystectomy Using a Standardized Reporting Methodology. *Eur Urol*. 2011 Feb;59(2):213–8.
22. Hirobe M, Tanaka T, Shindo T, et al. Complications within 90 days after radical cystectomy for bladder cancer: results of a multicenter prospective study in Japan. *Int J Clin Oncol*. 2018 Aug 13;23(4):734–41.
23. Hollenbeck BK, Miller DC, Taub D, et al. Identifying risk factors for potentially avoidable

- 1  
2  
3  
4 complications following radical cystectomy. *J Urol*. 2005 Oct;174(4 Pt 1):1231–7.  
5  
6 24. Hollenbeck BK, Miller DC, Taub DA, et al. The Effects of Adjusting for Case Mix on Mortality and  
7 Length of Stay Following Radical Cystectomy. *J Urol*. 2006 Oct;176(4):1363–8.  
8  
9 25. Hu JC, Chughtai B, O'Malley P, et al. Perioperative Outcomes, Health Care Costs, and Survival After  
10 Robotic-assisted Versus Open Radical Cystectomy: A National Comparative Effectiveness Study. *Eur*  
11 *Urol*. 2016 Jul;70(1):195–202.  
12  
13 26. Jerlström T, Gårdmark T, Carringer M, et al. Urinary bladder cancer treated with radical cystectomy:  
14 Perioperative parameters and early complications prospectively registered in a national population-  
15 based database. *Scand J Urol*. 2014 Aug 21;48(4):334–40.  
16  
17 27. Johar RS, Hayn MH, Stegemann AP, et al. Complications After Robot-assisted Radical Cystectomy:  
18 Results from the International Robotic Cystectomy Consortium. *Eur Urol*. 2013 Jul;64(1):52–7.  
19  
20 28. Johnson SC, Smith ZL, Golan S, et al. Temporal trends in perioperative morbidity for radical  
21 cystectomy using the National Surgical Quality Improvement Program database. *Urol Oncol Semin*  
22 *Orig Investig*. 2017 Nov;35(11):659.e13-659.e19.  
23  
24 29. Kader AK, Richards KA, et al. Robot-assisted laparoscopic vs open radical cystectomy: comparison of  
25 complications and perioperative oncological outcomes in 200 patients. *BJU Int*. 2013  
26 Aug;112(4):E290–4.  
27  
28 30. Kanno T, Ito K, Sawada A, et al. Complications and reoperations after laparoscopic radical  
29 cystectomy in a Japanese multicenter cohort. *Int J Urol*. 2019 Apr;26(4):493–8.  
30  
31 31. Khan MS, Challacombe B, Elhage O, et al. A dual-centre, cohort comparison of open, laparoscopic  
32 and robotic-assisted radical cystectomy. *Int J Clin Pract*. 2012 Jul;66(7):656–62.  
33  
34 32. Kim SP, Boorjian SA, Shah ND, et al. Contemporary trends of in-hospital complications and mortality  
35 for radical cystectomy. *BJU Int*. 2012 Oct;110(8):1163–8.  
36  
37 33. Koupparis A, Villeda-Sandoval C, Weale N, et al. Robot-assisted radical cystectomy with  
38 intracorporeal urinary diversion: impact on an established enhanced recovery protocol. *BJU Int*.  
39 2015 Dec;116(6):924–31.  
40  
41 34. Kulkarni GS, Urbach DR, Austin PC, et al. Impact of provider volume on operative mortality after  
42 radical cystectomy in a publicly funded healthcare system. *Can Urol Assoc J*. 2013;7(11–12):425–9.  
43  
44 35. Lenfant L, Campi R, Parra J, et al. Robotic versus open radical cystectomy throughout the learning  
45 phase: insights from a real-life multicenter study. *World J Urol*. 2019 Nov;  
46  
47 36. Leow JJ, Reese S, Trinh Q-D, et al. Impact of surgeon volume on the morbidity and costs of radical  
48 cystectomy in the USA: a contemporary population-based analysis. *BJU Int*. 2015 May;115(5):713–  
49 21.  
50  
51 37. Liedberg F, Holmberg E, Holmäng S, et al. Long-term follow-up after radical cystectomy with  
52 emphasis on complications and reoperations: A Swedish population-based survey. *Scand J Urol*  
53 *Nephrol*. 2012 Feb 19;46(1):14–8.  
54  
55 38. Lin W-Y, Wu C-T, Chen M-F, et al. Cystectomy for bladder cancer in elderly patients is not associated  
56 with increased 30- and 90-day mortality or readmission, length of stay, and cost: propensity score  
57  
58  
59  
60

1  
2  
3  
4  
5  
6  
7  
8  
9  
10  
11  
12  
13  
14  
15  
16  
17  
18  
19  
20  
21  
22  
23  
24  
25  
26  
27  
28  
29  
30  
31  
32  
33  
34  
35  
36  
37  
38  
39  
40  
41  
42  
43  
44  
45  
46  
47  
48  
49  
50  
51  
52  
53  
54  
55  
56  
57  
58  
59  
60

matching using a population database. *Cancer Manag Res.* 2018;10:1413–8.

39. Liu B, Domes T, Jana K. Evaluation of an enhanced recovery protocol on patients having radical cystectomy for bladder cancer. *Can Urol Assoc J.* 2018 Jul;12(12):421–6.
40. Llorente C, Lopez B, Hernandez V, et al. Variability in complications and operative mortality after radical cystectomy in Spain. *Actas Urol Esp.* 2017 Jan;41(1):32–8.
41. Llorente C, Guijarro A, Hernandez V, et al. Effect of hospital volume on 90-day mortality after radical cystectomy for bladder cancer in Spain. *World J Urol.* 2020 May;38(5):1221–8.
42. Llorente C, Guijarro A, Hernández V, et al. Outcomes of an enhanced recovery after radical cystectomy program in a prospective multicenter study: compliance and key components for success. *World J Urol.* 2020 Mar;
43. Lowrance WT, Rumohr JA, Chang SS, et al. Contemporary open radical cystectomy: analysis of perioperative outcomes. *J Urol.* 2008 Apr;179(4):1313–8.
44. Malavaud B, Vaessen C, Mouzin M, et al. Complications for radical cystectomy. Impact of the American Society of Anesthesiologists score. *Eur Urol.* 2001 Jan;39(1):79–84.
45. Mazzone E, D’Hondt F, Beato S, et al. Robot-assisted radical cystectomy with intracorporeal urinary diversion decreases postoperative complications only in highly comorbid patients: findings that rely on a standardized methodology recommended by the European Association of Urology Guidelines. *World J Urol.* 2020 May;
46. Monn MF, Kaimakliotis HZ, Cary KC, et al. Short-term morbidity and mortality of Indiana pouch, ileal conduit, and neobladder urinary diversion following radical cystectomy. *Urol Oncol Semin Orig Investig.* 2014 Nov;32(8):1151–7.
47. Moschini M, Gandaglia G, Dell’Oglio P, et al. Incidence and Predictors of 30-Day Readmission in Patients Treated With Radical Cystectomy: A Single Center European Experience. *Clin Genitourin Cancer.* 2016 Aug;14(4):e341-6.
48. Musch M, Janowski M, Steves A, et al. Comparison of early postoperative morbidity after robot-assisted and open radical cystectomy: results of a prospective observational study. *BJU Int.* 2014 Mar;113(3):458–67.
49. Nazmy M, Yuh B, Kawachi M, et al. Early and Late Complications of Robot-Assisted Radical Cystectomy: A Standardized Analysis by Urinary Diversion Type. *J Urol.* 2014 Mar;191(3):681–7.
50. Nazzani S, Mazzone E, Preisser F, et al. Comparison of Perioperative Outcomes Between Open and Robotic Radical Cystectomy: A Population-Based Analysis. *J Endourol.* 2018 Aug;32(8):701–9.
51. Nieuwenhuijzen JA, de Vries RR, Bex A, et al. Urinary Diversions after Cystectomy: The Association of Clinical Factors, Complications and Functional Results of Four Different Diversions. *Eur Urol.* 2008 Apr;53(4):834–44.
52. Novotny V, Froehner M, Koch R, et al. Age, American Society of Anesthesiologists physical status classification and Charlson score are independent predictors of 90-day mortality after radical cystectomy. *World J Urol.* 2016 Aug;34(8):1123–9.
53. Novotny V, Hakenberg OW, Wiessner D, et al. Perioperative Complications of Radical Cystectomy in

- a Contemporary Series. *Eur Urol*. 2007 Feb;51(2):397–402.
54. Patidar N, Yadav P, Sureka SK, et al. An audit of early complications of radical cystectomy using Clavien-Dindo classification. *Indian J Urol*. 2016;32(4):282–7.
55. Peyton CC, Reich RR, Tang D, et al. Identifying and Codifying Complications after Radical Cystectomy: Comparison of Administrative Diagnostic and Procedure Codes, and Clinical Chart Review. *J Urol*. 2019 Nov;202(5):913–9.
56. Porter MP, Gore JL, Wright JL. Hospital volume and 90-day mortality risk after radical cystectomy: a population-based cohort study. *World J Urol*. 2011 Feb;29(1):73–7.
57. Quek ML, Stein JP, Daneshmand S, et al. A Critical Analysis of Perioperative Mortality From Radical Cystectomy. *J Urol*. 2006 Mar;175(3):886–90.
58. Roghmann F, Sukumar S, Ravi P, T et al. Radical Cystectomy in the Elderly: National Trends and Disparities in Perioperative Outcomes and Quality of Care. *Urol Int*. 2014;92(1):27–34.
59. Salminen AP, Koskinen I, Perez IM, et al. Neoadjuvant Chemotherapy Does Not Increase the Morbidity of Radical Cystectomy: A 10-year Retrospective Nationwide Study. *Eur Urol Oncol*. 2018 Dec;1(6):525–30.
60. Schmid M, Rink M, Traumann M, et al. Evidence from the “PROspective MulticEnTer Radclal Cystectomy Series 2011 (PROMETRICS 2011)” Study: How are Preoperative Patient Characteristics Associated with Urinary Diversion Type After Radical Cystectomy for Bladder Cancer? *Ann Surg Oncol*. 2015 Mar 28;22(3):1032–42.
61. Shabsigh A, Korets R, Vora KC, et al. Defining Early Morbidity of Radical Cystectomy for Patients with Bladder Cancer Using a Standardized Reporting Methodology. *Eur Urol*. 2009 Jan;55(1):164–76.
62. Styn NR, Montgomery JS, Wood DP, et al. Matched Comparison of Robotic-assisted and Open Radical Cystectomy. *Urology*. 2012 Jun;79(6):1303–9.
63. Su S, Gu L, Ma X, et al. Comparison of Laparoscopic and Robot-assisted Radical Cystectomy for Bladder Cancer: Perioperative and Oncologic Outcomes. *Clin Genitourin Cancer*. 2019 Oct;17(5):e1048–53.
64. Sung HH, Ahn J-S, Seo S II, et al. A Comparison of Early Complications Between Open and Robot-Assisted Radical Cystectomy. *J Endourol*. 2012 Jun;26(6):670–5.
65. Svatek RS, Fisher MB, Matin SF, et al. Risk Factor Analysis in a Contemporary Cystectomy Cohort Using Standardized Reporting Methodology and Adverse Event Criteria. *J Urol*. 2010 Mar;183(3):929–34.
66. Udovicich C, Perera M, Huq M, et al. Hospital volume and perioperative outcomes for radical cystectomy: a population study. *BJU Int*. 2017 May;119 Suppl:26–32.
67. Wei C, Wan F, Zhao H, et al. Application of enhanced recovery after surgery in patients undergoing radical cystectomy. *J Int Med Res*. 2018 Dec;46(12):5011–8.
68. Wissing MD, Santos F, Zakaria AS, et al. Short- and long-term survival has improved after radical cystectomy for bladder cancer in Québec during the years 2000-2015. *J Surg Oncol*. 2019 Jun;119(8):1135–44.

1  
2  
3  
4  
5  
6  
7  
8  
9  
10  
11  
12  
13  
14  
15  
16  
17  
18  
19  
20  
21  
22  
23  
24  
25  
26  
27  
28  
29  
30  
31  
32  
33  
34  
35  
36  
37  
38  
39  
40  
41  
42  
43  
44  
45  
46  
47  
48  
49  
50  
51  
52  
53  
54  
55  
56  
57  
58  
59  
60

69. Takada N, Abe T, Shinohara N, et al. Peri-operative morbidity and mortality related to radical cystectomy: a multi-institutional retrospective study in Japan. *BJU Int*. 2012 Dec;110(11b):E756–64.
70. Woldu SL, Sanli O, Clinton TN, et al. Validating the predictors of outcomes after radical cystectomy for bladder cancer. *Cancer*. 2019 Jan 15;125(2):223–31.
71. Xylinas E, Green DA, Otto B, et al. Robotic-assisted Radical Cystectomy With Extracorporeal Urinary Diversion for Urothelial Carcinoma of the Bladder: Analysis of Complications and Oncologic Outcomes in 175 Patients With a Median Follow-up of 3 Years. *Urology*. 2013 Dec;82(6):1323–9.
72. Zhang JH, Ericson KJ, Thomas LJ, et al. Large Single Institution Comparison of Perioperative Outcomes and Complications of Open Radical Cystectomy, Intracorporeal Robot-Assisted Radical Cystectomy and Robotic Extracorporeal Approach. *J Urol*. 2020 Mar;203(3):512–21.
73. Clavien PA, Barkun J, de Oliveira ML, et al. The Clavien-Dindo Classification of Surgical Complications. *Ann Surg*. 2009 Aug;250(2):187–96.
74. Trotti A, Colevas AD, Setser A, et al. CTCAE v3.0: Development of a comprehensive grading system for the adverse effects of cancer treatment. *Semin Radiat Oncol*. 2003;13(3):176–81.
75. Nutt M, Scaief S, Dynda D, et al. Ileus and small bowel obstruction after radical cystectomy for bladder cancer: Analysis from the Nationwide Inpatient Sample. *Surg Oncol*. 2018 Sep;27(3):341–5.
76. Cerantola Y, Valerio M, Persson B, et al. Guidelines for perioperative care after radical cystectomy for bladder cancer: Enhanced Recovery After Surgery (ERAS®) society recommendations. *Clin Nutr*. 2013 Dec;32(6):879–87.
77. Pillai P, McEleavy I, Gaughan M, et al. A Double-Blind Randomized Controlled Clinical Trial to Assess the Effect of Doppler Optimized Intraoperative Fluid Management on Outcome Following Radical Cystectomy. *J Urol*. 2011 Dec;186(6):2201–6.
78. Choi H, Kang SHSG, Yoon DK, et al. Chewing Gum Has a Stimulatory Effect on Bowel Motility in Patients After Open or Robotic Radical Cystectomy for Bladder Cancer: A Prospective Randomized Comparative Study. *Urology*. 2011 Apr;77(4):884–90.
79. Lee CT, Chang SS, Kamat AM, et al. Alvimopan Accelerates Gastrointestinal Recovery After Radical Cystectomy: A Multicenter Randomized Placebo-Controlled Trial. *Eur Urol*. 2014 Aug;66(2):265–72.
80. Inman BA, Harel F, Tiguert R, et al. Routine Nasogastric Tubes Are Not Required Following Cystectomy With Urinary Diversion: A Comparative Analysis of 430 Patients. *J Urol*. 2003 Nov;170(5):1888–91.
81. Shafii M, Murphy DM, Donovan MG, et al. Is mechanical bowel preparation necessary in patients undergoing cystectomy and urinary diversion? *BJU Int*. 2002 May 12;89(9):879–81.
82. Wessels F, Lenhart M, Kowalewski KF, et al. Early recovery after surgery for radical cystectomy: comprehensive assessment and meta-analysis of existing protocols. *World J Urol*. 2020 Mar 2;
83. Williams SB, Cumberbatch MGK, Kamat AM, et al. Reporting Radical Cystectomy Outcomes Following Implementation of Enhanced Recovery After Surgery Protocols: A Systematic Review and Individual Patient Data Meta-analysis. *Eur Urol* [Internet]. 2020;1–12. Available from: <https://doi.org/10.1016/j.eururo.2020.06.039>

- 1  
2  
3  
4 84. Baack Kukreja JE, Messing EM, Shah JB. Are we doing “better”? The discrepancy between perception  
5 and practice of enhanced recovery after cystectomy principles among urologic oncologists. *Urol*  
6 *Oncol*. 2016 Mar;34(3):120.e17-21.  
7  
8 85. Clifford TG, Katebian B, Van Horn CM, et al. Urinary tract infections following radical cystectomy and  
9 urinary diversion: a review of 1133 patients. *World J Urol*. 2018 May 25;36(5):775–81.  
10  
11 86. van Hemelrijck M, Thorstenson A, Smith P, et al. Risk of in-hospital complications after radical  
12 cystectomy for urinary bladder carcinoma: population-based follow-up study of 7608 patients. *BJU*  
13 *Int*. 2013 Dec;112(8):1113–20.  
14  
15 87. Kolwijck E, Seegers AEM, Tops SCM, et al. Incidence and microbiology of postoperative infections  
16 after radical cystectomy and ureteral stent removal; a retrospective cohort study. *BMC Infect Dis*.  
17 2019;19(1):303.  
18  
19 88. Parker WP, Tollefson MK, Heins CN, et al. Characterization of perioperative infection risk among  
20 patients undergoing radical cystectomy: Results from the national surgical quality improvement  
21 program. *Urol Oncol*. 2016 Dec;34(12):532.e13-532.e19.  
22  
23 89. Pariser JJ, Anderson BB, Pearce SM, et al. The effect of broader, directed antimicrobial prophylaxis  
24 including fungal coverage on perioperative infectious complications after radical cystectomy. *Urol*  
25 *Oncol Semin Orig Investig*. 2016;34(3):121.e9-121.e14.  
26  
27 90. Krasnow RE, Mossanen M, Koo S, et al. Prophylactic Antibiotics and Postoperative Complications of  
28 Radical Cystectomy: A Population Based Analysis in the United States. *J Urol*. 2017;198(2):297–304.  
29  
30 91. European Association of Urology. Guideline on urological infections [Internet]. [cited 2020 Apr 20].  
31 Available from: <https://uroweb.org/guideline/urological-infections/#3>  
32  
33 92. American Urological Association. Urologic Procedures and Antimicrobial Prophylaxis (2019)  
34 [Internet]. [cited 2020 May 11]. Available from: [https://www.auanet.org/guidelines/urologic-](https://www.auanet.org/guidelines/urologic-procedures-and-antimicrobial-prophylaxis-(2019))  
35 [procedures-and-antimicrobial-prophylaxis-\(2019\)](https://www.auanet.org/guidelines/urologic-procedures-and-antimicrobial-prophylaxis-(2019))  
36  
37 93. Reese SW, Ji E, Paciotti M, et al. Risk factors and reasons for reoperation after radical cystectomy.  
38 *Urol Oncol Semin Orig Investig*. 2020 Apr;38(4):269–77.  
39  
40 94. Goossens-Laan CA, Gooiker GA, van Gijn W, et al. A systematic review and meta-analysis of the  
41 relationship between hospital/surgeon volume and outcome for radical cystectomy: an update for  
42 the ongoing debate. *Eur Urol*. 2011 May;59(5):775–83.  
43  
44 95. Konety BR, Allareddy V, Herr H. Complications after radical cystectomy: analysis of population-based  
45 data. *Urology*. 2006 Jul;68(1):58–64.  
46  
47 96. Vetterlein MW, Meyer CP, Leyh-Bannurah S-R, et al. Effect of Hospital and Surgeon Case Volume on  
48 Perioperative Quality of Care and Short-term Outcomes After Radical Cystectomy for Muscle-  
49 invasive Bladder Cancer: Results From a European Tertiary Care Center Cohort. *Clin Genitourin*  
50 *Cancer*. 2017 Oct;15(5):e809–17.  
51  
52 97. Bruins HM, Veskimäe E, Hernández V, et al. The Importance of Hospital and Surgeon Volume as  
53 Major Determinants of Morbidity and Mortality After Radical Cystectomy for Bladder Cancer: A  
54 Systematic Review and Recommendations by the European Association of Urology Muscle-invasive  
55 and Metastatic Bladd. *Eur Urol Oncol*. 2019 Dec 19;  
56  
57  
58  
59  
60

- 1  
2  
3  
4 98. Parekh DJ, Reis IM, Castle EP, et al. Robot-assisted radical cystectomy versus open radical  
5 cystectomy in patients with bladder cancer ( RAZOR ): an open-label , randomised , phase 3 , non-  
6 inferiority trial. *Lancet*. 2018 Jun;391(10139):2525–36.  
7  
8 99. Nix J, Smith A, Kurpad R, et al. Prospective Randomized Controlled Trial of Robotic versus Open  
9 Radical Cystectomy for Bladder Cancer: Perioperative and Pathologic Results. *Eur Urol*. 2010  
10 Feb;57(2):196–201.  
11  
12 100. Bochner BH, Dalbagni G, Sjoberg DD, et al. Comparing Open Radical Cystectomy and Robot-assisted  
13 Laparoscopic Radical Cystectomy: A Randomized Clinical Trial. *Eur Urol*. 2015 Jun;67(6):1042–50.  
14  
15 101. Parekh DJ, Messer J, Fitzgerald J, et al. Perioperative Outcomes and Oncologic Efficacy from a Pilot  
16 Prospective Randomized Clinical Trial of Open Versus Robotic Assisted Radical Cystectomy. *J Urol*.  
17 2013 Feb;189(2):474–9.  
18  
19 102. Khan MS, Gan C, Ahmed K, et al. A Single-centre Early Phase Randomised Controlled Three-arm Trial  
20 of Open, Robotic, and Laparoscopic Radical Cystectomy (CORAL). *Eur Urol*. 2016 Apr;69(4):613–21.  
21  
22 103. Catto JWF, Khetrpal P, Ambler G, et al. Robot-assisted radical cystectomy with intracorporeal  
23 urinary diversion versus open radical cystectomy (iROC): Protocol for a randomised controlled trial  
24 with internal feasibility study. *BMJ Open*. 2018;8(8):1–10.  
25  
26 104. Williams SB, Huo J, Chamie K, et al. Underutilization of Radical Cystectomy Among Patients  
27 Diagnosed with Clinical Stage T2 Muscle-invasive Bladder Cancer. *Eur Urol Focus*. 2017 Apr;3(2–  
28 3):258–64.  
29  
30 105. Ramirez JA, McIntosh AG, Strehlow R, et al. Definition, incidence, risk factors, and prevention of  
31 paralytic ileus following radical cystectomy: a systematic review. *Eur Urol*. 2013 Oct;64(4):588–97.  
32  
33 106. Mitropoulos D, Artibani W, Graefen M, et al. Reporting and Grading of Complications After Urologic  
34 Surgical Procedures: An ad hoc EAU Guidelines Panel Assessment and Recommendations. *Eur Urol*.  
35 2012 Feb;61(2):341–9.  
36  
37  
38  
39  
40

41 Legend for Figure 1: Figure 1. PRISMA flowchart  
42  
43  
44  
45  
46  
47  
48  
49  
50  
51  
52  
53  
54  
55  
56  
57  
58  
59  
60

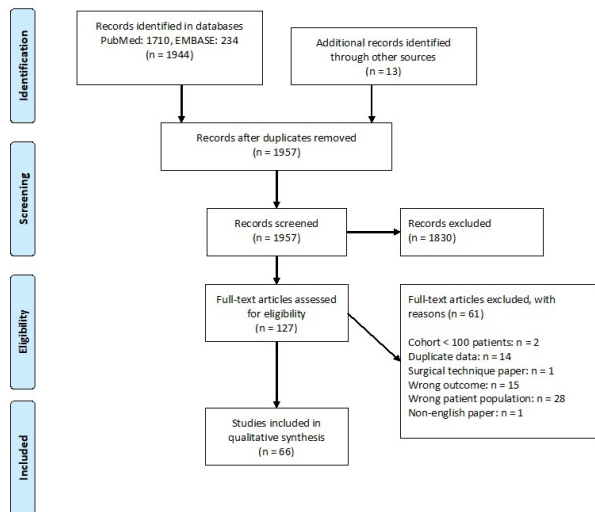

Figure 1. PRISMA flowchart

333x187mm (96 x 96 DPI)



## Appendix 1

| Database       | Search string                                                                                                                                                                                                                                                                                                                                                                                                                                                                                                                                                                                                                                                                                                                         |
|----------------|---------------------------------------------------------------------------------------------------------------------------------------------------------------------------------------------------------------------------------------------------------------------------------------------------------------------------------------------------------------------------------------------------------------------------------------------------------------------------------------------------------------------------------------------------------------------------------------------------------------------------------------------------------------------------------------------------------------------------------------|
| PubMed/MEDLINE | <p><b>#1:</b> "urinary bladder neoplasms" [MeSH Terms] OR "urothelial carcinoma"[Title/Abstract]) OR "invasive urothelial bladder carcinomas"[Title/Abstract]) OR "bladder cancer"[Title/Abstract]</p> <p><b>#2:</b> "cystectomy"[Text Word] OR "cystoprostatectomy"[Title/Abstract]</p> <p><b>#3:</b> "postoperative complications"[Text Word] OR "length of stay"[Text Word] OR "complication*" [Title/Abstract] OR "clavien*" [Title/Abstract] OR "reoperation*" [Title/Abstract] OR "mortality"[Title/Abstract]</p> <p><b>#4:</b> #1 AND #2 AND #3</p> <p><b>#5:</b> #4 NOT ("review" [Publication Type] OR "letter"[Publication Type] OR "comment"[Publication Type])</p> <p>Filter: English, humans, publication date 1990-</p> |
| EMBASE         | <p><b>#1:</b> exp bladder cancer/ OR bladder carcinoma.mp/ OR muscle invasive bladder cancer.mp OR bladder cancer.mp OR invasive urothelial cancer.mp OR urothelial carcinoma.mp</p> <p><b>#2:</b> exp cystectomy/ OR cystectomy.mp OR cystoprostatectomy.mp</p> <p><b>#3:</b> exp postoperative complication/ OR exp length of stay/ OR complication/ OR exp reoperation/ OR clavien*.mp OR complication*.mp OR reoperation*.mp OR length of stay.mp OR mortality.mp</p> <p><b>#4:</b> #1 AND #2 AND #3</p> <p>Limits: human, English language, exclude Medline journals</p>                                                                                                                                                         |

## Appendix 2

| Reference                | Number of Martin criteria fulfilled | New Castle-Ottawa Scale score |               |         |
|--------------------------|-------------------------------------|-------------------------------|---------------|---------|
|                          |                                     | Selection                     | Comparability | Outcome |
| Afshar et al.            | NA                                  | ****                          | **            | **      |
| Al-Daghmin et al.        | 5                                   | ****                          | *             | ***     |
| Arora et al.             | 5                                   | ****                          | **            | ***     |
| Björnsson et al.         | 7                                   | ****                          | 0             | ***     |
| Boorjian et al.          | NA                                  | ***                           | **            | ***     |
| Cantiello et al.         | 10                                  | ****                          | 0             | ***     |
| Chang et al.             | 6                                   | ****                          | *             | ***     |
| De Nunzio et al.         | 7                                   | ****                          | **            | **      |
| de Vries et al.          | NA                                  | ****                          | **            | ***     |
| Djaladat et al.          | 9                                   | ****                          | **            | **      |
| Fairey et al.            | 5                                   | ****                          | **            | ***     |
| Flamiatos et al.         | 6                                   | ****                          | *             | ***     |
| Gschliesser et al.       | 5*                                  | ****                          | **            | ***     |
| Hanna et al.             | NA                                  | ****                          | **            | **      |
| Hayn et al.              | 10                                  | ****                          | **            | ***     |
| Hirobe et al.            | 10                                  | ****                          | **            | ***     |
| Hollenbeck et al. (2005) | 5                                   | ****                          | *             | ***     |
| Hollenbeck et al. (2006) | NA                                  | ****                          | **            | ***     |
| Hu et al.                | 4*                                  | ****                          | **            | ***     |
| Jerlström et al.         | 7                                   | ****                          | *             | ***     |
| Johar et al.             | 8                                   | ****                          | **            | ***     |
| Johnson et al.           | 6                                   | ****                          | **            | ***     |

|                        |    |      |    |     |
|------------------------|----|------|----|-----|
| Kader et al.           | 5  | **** | 0  | *** |
| Kanno et al.           | 7  | **** | 0  | *** |
| Khan et al.            | 8  | **** | ** | *** |
| Kim et al.             | 6* | **** | *  | *** |
| Koupparis et al.       | 5  | **** | 0  | *** |
| Kulkarni et al.        | NA | **** | ** | *** |
| Lenfant et al.         | 6  | **** | 0  | *** |
| Leow et al.            | 3  | **** | ** | *** |
| Liedberg et al.        | NA | **** | 0  | *** |
| Lin et al.             | NA | **** | ** | *** |
| Liu et al.             | 5* | **** | 0  | *** |
| Llorente et al. (2017) | 2  | **** | *  | *** |
| Llorente et al. (2020) | 7  | **** | ** | *** |
| Llorente et al. (2020) | NA | **** | ** | *** |
| Lowrance et al.        | 7  | **** | 0  | *** |
| Malavaud et al.        | 6  | **** | 0  | *** |
| Mazzone et al.         | 9  | **** | ** | *** |
| Monn et al.            | 9  | **** | ** | *** |
| Moschini et al.        | 2  | **** | *  | *** |
| Musch et al.           | 7  | **** | 0  | *** |
| Nazmy et al.           | 8  | **** | ** | *** |
| Nazzani et al.         | 4* | **** | ** | *** |
| Nieuwenhuijzen et al.  | 8  | **** | *  | *** |
| Novotny et al. (2007)  | NA | **** | 0  | *** |
| Novotny et al. (2016)  | 5  | **** | ** | *** |

|                  |    |      |    |     |
|------------------|----|------|----|-----|
| Patidar et al.   | 7  | **** | 0  | *** |
| Peyton et al.    | 5  | **** | 0  | *** |
| Porter et al.    | NA | **** | ** | *** |
| Quek et al.      | NA | **** | 0  | *** |
| Roghmann et al.  | 5  | **** | ** | *** |
| Salminen et al.  | 7  | **** | ** | *** |
| Schmid et al.    | 4  | **** | *  | *** |
| Shabsigh et al.  | 10 | **** | ** | *** |
| Styn et al.      | 6  | **** | ** | *** |
| Su et al.        | 5  | **** | 0  | *** |
| Sung et al.      | 9  | **** | *  | *** |
| Svatek et al.    | 9  | **** | *  | *** |
| Takada et al.    | 9  | **** | *  | *** |
| Udovicuch et al. | NA | **** | 0  | *** |
| Wei et al.       | 3  | **** | 0  | *   |
| Wissing et al.   | NA | **** | ** | *** |
| Woldu et al.     | 4  | **** | ** | *** |
| Xylinas et al.   | 7  | **** | 0  | *** |
| Zhang et al.     | 7  | **** | ** | *** |

NA: Not applicable (study not reporting complications). \*Studies have been scored as fulfilling the criteria of "outpatient information included" as this criterium does not apply to the studies with an outcome period including in-house complications only.

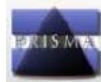

# PRISMA 2009 Checklist

1  
2  
3  
4  
5  
6  
7  
8  
9  
10  
11  
12  
13  
14  
15  
16  
17  
18  
19  
20  
21  
22  
23  
24  
25  
26  
27  
28  
29  
30  
31  
32  
33  
34  
35  
36  
37  
38  
39  
40  
41  
42  
43  
44  
45  
46  
47

| Section/topic                      | #  | Checklist item                                                                                                                                                                                                                                                                                              | Reported on page # |
|------------------------------------|----|-------------------------------------------------------------------------------------------------------------------------------------------------------------------------------------------------------------------------------------------------------------------------------------------------------------|--------------------|
| <b>TITLE</b>                       |    |                                                                                                                                                                                                                                                                                                             |                    |
| Title                              | 1  | Identify the report as a systematic review, meta-analysis, or both.                                                                                                                                                                                                                                         | 3                  |
| <b>ABSTRACT</b>                    |    |                                                                                                                                                                                                                                                                                                             |                    |
| Structured summary                 | 2  | Provide a structured summary including, as applicable: background; objectives; data sources; study eligibility criteria, participants, and interventions; study appraisal and synthesis methods; results; limitations; conclusions and implications of key findings; systematic review registration number. | 2                  |
| <b>INTRODUCTION</b>                |    |                                                                                                                                                                                                                                                                                                             |                    |
| Rationale                          | 3  | Describe the rationale for the review in the context of what is already known.                                                                                                                                                                                                                              | 3                  |
| Objectives                         | 4  | Provide an explicit statement of questions being addressed with reference to participants, interventions, comparisons, outcomes, and study design (PICOS).                                                                                                                                                  | 3                  |
| <b>METHODS</b>                     |    |                                                                                                                                                                                                                                                                                                             |                    |
| Protocol and registration          | 5  | Indicate if a review protocol exists, if and where it can be accessed (e.g., Web address), and, if available, provide registration information including registration number.                                                                                                                               | 3                  |
| Eligibility criteria               | 6  | Specify study characteristics (e.g., PICOS, length of follow-up) and report characteristics (e.g., years considered, language, publication status) used as criteria for eligibility, giving rationale.                                                                                                      | 3                  |
| Information sources                | 7  | Describe all information sources (e.g., databases with dates of coverage, contact with study authors to identify additional studies) in the search and date last searched.                                                                                                                                  | 3                  |
| Search                             | 8  | Present full electronic search strategy for at least one database, including any limits used, such that it could be repeated.                                                                                                                                                                               | appendix 1         |
| Study selection                    | 9  | State the process for selecting studies (i.e., screening, eligibility, included in systematic review, and, if applicable, included in the meta-analysis).                                                                                                                                                   | 3                  |
| Data collection process            | 10 | Describe method of data extraction from reports (e.g., piloted forms, independently, in duplicate) and any processes for obtaining and confirming data from investigators.                                                                                                                                  | 3                  |
| Data items                         | 11 | List and define all variables for which data were sought (e.g., PICOS, funding sources) and any assumptions and simplifications made.                                                                                                                                                                       | 3                  |
| Risk of bias in individual studies | 12 | Describe methods used for assessing risk of bias of individual studies (including specification of whether this was done at the study or outcome level), and how this information is to be used in any data synthesis.                                                                                      | 4                  |
| Summary measures                   | 13 | State the principal summary measures (e.g., risk ratio, difference in means).                                                                                                                                                                                                                               | 4                  |

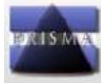

# PRISMA 2009 Checklist

|                      |    |                                                                                                                                                           |    |
|----------------------|----|-----------------------------------------------------------------------------------------------------------------------------------------------------------|----|
| Synthesis of results | 14 | Describe the methods of handling data and combining results of studies, if done, including measures of consistency (e.g., $I^2$ ) for each meta-analysis. | NA |
|----------------------|----|-----------------------------------------------------------------------------------------------------------------------------------------------------------|----|

Page 1 of 2

| Section/topic                 | #  | Checklist item                                                                                                                                                                                           | Reported on page # |
|-------------------------------|----|----------------------------------------------------------------------------------------------------------------------------------------------------------------------------------------------------------|--------------------|
| Risk of bias across studies   | 15 | Specify any assessment of risk of bias that may affect the cumulative evidence (e.g., publication bias, selective reporting within studies).                                                             | 4                  |
| Additional analyses           | 16 | Describe methods of additional analyses (e.g., sensitivity or subgroup analyses, meta-regression), if done, indicating which were pre-specified.                                                         | NA                 |
| <b>RESULTS</b>                |    |                                                                                                                                                                                                          |                    |
| Study selection               | 17 | Give numbers of studies screened, assessed for eligibility, and included in the review, with reasons for exclusions at each stage, ideally with a flow diagram.                                          | 4                  |
| Study characteristics         | 18 | For each study, present characteristics for which data were extracted (e.g., study size, PICOS, follow-up period) and provide the citations.                                                             | 4                  |
| Risk of bias within studies   | 19 | Present data on risk of bias of each study and, if available, any outcome level assessment (see item 12).                                                                                                | 9                  |
| Results of individual studies | 20 | For all outcomes considered (benefits or harms), present, for each study: (a) simple summary data for each intervention group (b) effect estimates and confidence intervals, ideally with a forest plot. | NA                 |
| Synthesis of results          | 21 | Present results of each meta-analysis done, including confidence intervals and measures of consistency.                                                                                                  | NA                 |
| Risk of bias across studies   | 22 | Present results of any assessment of risk of bias across studies (see Item 15).                                                                                                                          | NA                 |
| Additional analysis           | 23 | Give results of additional analyses, if done (e.g., sensitivity or subgroup analyses, meta-regression [see Item 16]).                                                                                    | NA                 |
| <b>DISCUSSION</b>             |    |                                                                                                                                                                                                          |                    |
| Summary of evidence           | 24 | Summarize the main findings including the strength of evidence for each main outcome; consider their relevance to key groups (e.g., healthcare providers, users, and policy makers).                     | 10                 |
| Limitations                   | 25 | Discuss limitations at study and outcome level (e.g., risk of bias), and at review-level (e.g., incomplete retrieval of identified research, reporting bias).                                            | 12                 |
| Conclusions                   | 26 | Provide a general interpretation of the results in the context of other evidence, and implications for future research.                                                                                  | 12                 |
| <b>FUNDING</b>                |    |                                                                                                                                                                                                          |                    |
| Funding                       | 27 | Describe sources of funding for the systematic review and other support (e.g., supply of data); role of funders for the systematic review.                                                               | 13                 |

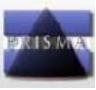

# PRISMA 2009 Checklist

1  
2  
3  
4  
5  
6  
7  
8  
9  
10  
11  
12  
13  
14  
15  
16  
17  
18  
19  
20  
21  
22  
23  
24  
25  
26  
27  
28  
29  
30  
31  
32  
33  
34  
35  
36  
37  
38  
39  
40  
41  
42  
43  
44  
45  
46  
47

*From:* Moher D, Liberati A, Tetzlaff J, Altman DG, The PRISMA Group (2009). Preferred Reporting Items for Systematic Reviews and Meta-Analyses: The PRISMA Statement. PLoS Med 6(7): e1000097. doi:10.1371/journal.pmed1000097

For more information, visit: [www.prisma-statement.org](http://www.prisma-statement.org).

Page 2 of 2

For peer review only

# BMJ Open

## Short-term morbidity and mortality following radical cystectomy: a systematic review

|                                 |                                                                                                                                                                                                                                                                                                                                                                                                                                                                                                                                                                                                                                                                                                                                           |
|---------------------------------|-------------------------------------------------------------------------------------------------------------------------------------------------------------------------------------------------------------------------------------------------------------------------------------------------------------------------------------------------------------------------------------------------------------------------------------------------------------------------------------------------------------------------------------------------------------------------------------------------------------------------------------------------------------------------------------------------------------------------------------------|
| Journal:                        | <i>BMJ Open</i>                                                                                                                                                                                                                                                                                                                                                                                                                                                                                                                                                                                                                                                                                                                           |
| Manuscript ID                   | bmjopen-2020-043266.R1                                                                                                                                                                                                                                                                                                                                                                                                                                                                                                                                                                                                                                                                                                                    |
| Article Type:                   | Original research                                                                                                                                                                                                                                                                                                                                                                                                                                                                                                                                                                                                                                                                                                                         |
| Date Submitted by the Author:   | 03-Mar-2021                                                                                                                                                                                                                                                                                                                                                                                                                                                                                                                                                                                                                                                                                                                               |
| Complete List of Authors:       | Maibom, Sophia; Rigshospitalet, Urological Research Unit, Department of Urology; University of Copenhagen, Faculty of Health and Medical Sciences<br>Joensen, Ulla ; Rigshospitalet, Urological Research Unit, Department of Urology.; University of Copenhagen, Faculty of Health and Medical Sciences<br>Poulsen, Alicia ; Rigshospitalet, Urological Research Unit, Department of Urology<br>Kehlet, Henrik; Rigshospitalet, Copenhagen University, Section for Surgical Pathophysiology<br>Brasso, Klaus; Rigshospitalet, Urological Research Unit, Department of Urology<br>Røder, Martin Andreas; Rigshospitalet, Urological Research Unit, Department of Urology; University of Copenhagen, Faculty of Health and Medical Sciences |
| <b>Primary Subject Heading</b>: | Urology                                                                                                                                                                                                                                                                                                                                                                                                                                                                                                                                                                                                                                                                                                                                   |
| Secondary Subject Heading:      | Surgery                                                                                                                                                                                                                                                                                                                                                                                                                                                                                                                                                                                                                                                                                                                                   |
| Keywords:                       | Bladder disorders < UROLOGY, SURGERY, Urological tumours < UROLOGY                                                                                                                                                                                                                                                                                                                                                                                                                                                                                                                                                                                                                                                                        |
|                                 |                                                                                                                                                                                                                                                                                                                                                                                                                                                                                                                                                                                                                                                                                                                                           |

SCHOLARONE™  
Manuscripts





I, the Submitting Author has the right to grant and does grant on behalf of all authors of the Work (as defined in the below author licence), an exclusive licence and/or a non-exclusive licence for contributions from authors who are: i) UK Crown employees; ii) where BMJ has agreed a CC-BY licence shall apply, and/or iii) in accordance with the terms applicable for US Federal Government officers or employees acting as part of their official duties; on a worldwide, perpetual, irrevocable, royalty-free basis to BMJ Publishing Group Ltd ("BMJ") its licensees and where the relevant Journal is co-owned by BMJ to the co-owners of the Journal, to publish the Work in this journal and any other BMJ products and to exploit all rights, as set out in our [licence](#).

The Submitting Author accepts and understands that any supply made under these terms is made by BMJ to the Submitting Author unless you are acting as an employee on behalf of your employer or a postgraduate student of an affiliated institution which is paying any applicable article publishing charge ("APC") for Open Access articles. Where the Submitting Author wishes to make the Work available on an Open Access basis (and intends to pay the relevant APC), the terms of reuse of such Open Access shall be governed by a Creative Commons licence – details of these licences and which [Creative Commons](#) licence will apply to this Work are set out in our licence referred to above.

Other than as permitted in any relevant BMJ Author's Self Archiving Policies, I confirm this Work has not been accepted for publication elsewhere, is not being considered for publication elsewhere and does not duplicate material already published. I confirm all authors consent to publication of this Work and authorise the granting of this licence.

# Short-term morbidity and mortality following radical cystectomy: a systematic review

Sophia Liff Maibom<sup>§\*1</sup>, Ulla Nordström Joensen<sup>\*1</sup>, Alicia Martin Poulsen<sup>\*1</sup>, Henrik Kehlet<sup>\*2</sup>, Klaus Brasso<sup>\*1</sup>,  
Martin Andreas Røder<sup>\*1</sup>

<sup>\*1</sup> Urological Research Unit, Department of Urology, Rigshospitalet. Faculty of Health and Medical Sciences, University of Copenhagen, Copenhagen, Denmark.

<sup>\*2</sup> Surgical Pathophysiology Unit, Rigshospitalet, Copenhagen, Denmark

<sup>§</sup>Corresponding author: Sophia Liff Maibom, Urological Research Department 7521, Rigshospitalet, Ole Maaløes Vej 24, 2200 Copenhagen N, Denmark. E-mail: d034920@dadlnet.dk

Word count: 3193

## Abstract

**Objective:** To study short-term (< 90 days) morbidity and mortality following radical cystectomy (RC) for bladder cancer and identify modifiable risk factors associated with these.

**Design:** Systematic review.

**Methods:** The systematic review was conducted according to the Preferred Reporting Items for Systematic Review and Meta-analysis (PRISMA) guidelines. PubMed and EMBASE were searched for relevant papers on 11<sup>th</sup> of June 2019 and re-run on the 27<sup>th</sup> of May 2020. Studies reporting complications, reoperations, length of stay, and mortality within 90 days were included. Studies were reviewed according to criteria from the Oxford Centre for Evidence-Based Medicine and the quality of evidence was assessed using the New Castle Ottawa Scale.

**Results:** The search retrieved 1957 articles. Sixty-six articles were included. The quality of evidence was poor to good. Most studies were retrospective, and no randomised clinical trials were identified. Of included studies a median of 6 Martin criteria for reporting complications after surgery were fulfilled. The Clavien-Dindo Classification for grading complications was most frequently used. The weighted overall complication rate after RC was 34.9% (range 28.8–68.8) for in house complications, 39.0% (range 27.3–80.0) for 30-day complications, and 58.5% (range 36.1–80.5) for 90-day complications. The most common types of complications reported were gastrointestinal (29.0%) and infectious (26.4%). The weighted mortality rate was 2.4% (range 0.9–4.7) for in house mortality, 2.1% (0.0–3.7) for 30-day mortality, and 4.7% (range 0.0–7.0) for 90-day mortality. Age and comorbidity were identified as the best predictors for complications following RC.

**Conclusion:** Short-term morbidity and mortality is high following RC. Reporting of complications is heterogeneous and the quality of evidence is generally low. There is a continuous need for randomised studies to address any intervention that can reduce morbidity and mortality following RC.

PROSPERO ID: 104937

## Article summary

Strengths and limitations of this study

- This systematic review can provide as a reference paper for future studies and when measuring quality of care.
- This systematic review emphasizes the continuous need to identify and moderate risk factors for complications and optimize postoperative management plans to reduce both morbidity and mortality associated with radical cystectomy.
- This review is limited by heterogeneity in outcome measures of morbidity with a lack of clear definitions of surgical complications making a direct comparison between studies difficult.

## INTRODUCTION

Radical cystectomy (RC) with pelvic lymph node dissection and urinary diversion is the preferred treatment for non-metastatic muscle-invasive bladder cancer (BC), and for some cases of high-risk non-muscle-invasive BC, in patients fit for major surgery (1). RC is a comprehensive procedure that involves surgery to several organ systems and as a result it is associated with high postoperative morbidity and mortality. Attempts have been made over the years to reduce postoperative complications such as the introduction of Enhanced Recovery After Surgery (ERAS) programs. However, addressing morbidity and mortality associated with RC across surgical cohorts remains important for preoperative counselling, planning of treatment, identification of modifiable risk factors to reduce morbidity and mortality, future clinical trial design, and for assessment of surgical quality. Several measures of morbidity are clinically important such as complication rate, reoperation rate, length of stay (LOS), readmission rate, and mortality. In this paper, we conducted a contemporary systematic review of the prevalence of short-term (< 90 days) morbidity and mortality following RC for BC.

## METHODS

### Search strategy and study selection

This systematic review was performed in accordance with the Preferred Reporting Items for Systematic Review and Meta-analysis (PRISMA) guidelines (2). A published protocol (PROSPERO ID: 104937) with pre-specified outcomes, inclusion criteria and search strategy is accessible online.

A systematic literature search in PubMed and EMBASE was conducted on 11<sup>th</sup> of June 2019 and re-run on the 27<sup>th</sup> of May 2020. A search string was created with the help of an information specialist (Appendix 1).

Articles were screened in a two-stage selection process. In the first stage, two authors (S.L.M. and M.A.R.) reviewed abstracts. All prospective and retrospective studies on short-term (< 90 days) morbidity and mortality after RC were included. Trials with less than 100 participants, indications for cystectomy other than BC, extended procedure (e.g. nephroureterectomy), salvage/palliative cystectomy, organ sparing cystectomy (e.g. partial cystectomy, prostate-sparing cystectomy, vaginal sparing cystectomy, seminal vesicles sparing cystectomy), selected patient group (e.g. certain age groups, women only), feasibility studies, surgical technique-only papers, animal series, and studies not published in English were excluded. Conference papers, case reports, book chapters, review papers, editorials, comments, letters to the editors, and abstracts were also excluded. When in doubt, studies were maintained for further review. In the second stage, the full text of all included articles was obtained and read by the same two authors. An agreement was reached through consensus using Covidence Systematic Review software (3). Any disagreement was resolved by discussion and the final decision was based on a consensus. In case of duplicate data/study the following criteria were applied in the selection: 1) outcome (studies reporting on complications were prioritized over LOS, mortality), 2) size of the cohort (larger studies were prioritized over smaller studies), 3) methodology (prospective studies were prioritized over retrospective studies and extraction of data from medical/hospital records over record linkage (e.g. ICD-codes in a database)), 4) study period (studies with the most recent study period were prioritized).

### Data extraction and quality assessment

The following data was extracted from all studies where possible: first author, data source (e.g. single-centre, multicenter, database), institution/country of origin, study period, year of publication, number of cases, study design, length of follow up, the classification system used for grading complications, use of fast track/ERAS protocol, demographics (age, gender, body mass index (BMI), Charlson Comorbidity Index (CCI),

American Society of Anesthesiologists (ASA) score, pT-stage, N-stage, neoadjuvant therapy, previous radiation therapy, prior abdominal/pelvic surgery), outcomes (urinary diversion, number of total complications, complication rate, segregated complications, complication reasons, mortality rate, LOS, reoperations, risk factors for outcomes).

The quality of reporting complications was estimated using the Martin criteria providing a score from 0–10 (4). Furthermore, the level of evidence was rated according to criteria from the Oxford Centre for Evidence-Based Medicine (5). The methodological quality of the studies was assessed using the Newcastle-Ottawa Scale (NOS) for observational comparative studies (6).

### **Outcome measures**

The primary outcome was the overall complication rate: the number of patients with one or more complication(s) within 90 days after RC regardless of the classification system used. Secondary outcomes were the following: rate of graded complications according to severity grade utilized; frequencies of types of complications; LOS, reoperation rate; mortality rate; and risk factors for the development of outcomes of morbidity (e.g. complications, death, reoperations).

### **Statistical analysis**

Descriptive statistics were used. A weighted average and range were calculated for all rates. A meta-analysis on risk factors for morbidity was not possible due to the high heterogeneity of reporting in the multivariate analysis across studies.

### **Patient and public involvement**

No patients were involved in conducting this review.

## **RESULTS**

The literature search retrieved 1957 articles after removing duplicates. Of these 66 studies met the in- and exclusion criteria (7–72). The process is outlined in Figure 1.

### **Characteristics of included studies**

The characteristics of the included studies are summarized in Table 1. Twenty-nine studies (43.9%) were single-centre studies and 37 studies (56.1%) were register or multicenter database studies. Most studies (71.2%) were retrospective, retrospective studies of prospectively maintained databases (12.1%) or combined retrospective and prospective studies (4.5%). Only eight (12.1%) were purely prospective surgical series. Patients were operated in the period 1990–2018. Of included studies, only two reported that an ERAS protocol was used for the entire cohort (16,48), and in six studies an ERAS protocol was used in a part of the cohort (33,39,42,67,69,72). In the rest of the included studies, an ERAS protocol was not used, or the authors did not report on perioperative care.

Table 1. Summary of patient characteristics.

|                                                          |                        | Number of patients with data available (sum of references) | References                                                                       |
|----------------------------------------------------------|------------------------|------------------------------------------------------------|----------------------------------------------------------------------------------|
| <b>Demographics</b>                                      |                        |                                                            |                                                                                  |
| Percentage of males (weighted average, % (range))        | 80.8% (71.1–99.1)      | 194 769                                                    | (7–14,16–23,25,26,28–36,39,41–52,54–72)                                          |
| Age                                                      |                        |                                                            |                                                                                  |
| - weighted median (range)                                | 69 years (63–73)       | 69 076                                                     | (7,9–11,13,14,16,17,19–22,26,27,29,30,43,45,47,48,50–52,55–58,60,61,63,65,68–72) |
| - weighted mean (range)                                  | 68.2 years (56.2–72.1) | 104 373                                                    | (8,12,19,23,29,44,47,48,62,64,70,71)                                             |
| BMI                                                      |                        |                                                            |                                                                                  |
| - weighted median (range)                                | 26.1 (22.3–27.8)       | 10 332                                                     | (9,10,14,16,21,22,26,27,30,35,45,47,48,61,63,65,69,71,72)                        |
| - weighted mean (range)                                  | 27.6 (20.4–29.7)       | 13 187                                                     | (8,12,17–19,28,29,44,47,48,54,59,62,64,67,70,71)                                 |
| ASA score (weighted average, % (range))                  |                        |                                                            |                                                                                  |
| - I                                                      | 8.0% (0–35.1)          | 15 202                                                     | (10,11,14,19,26,28–31,33,37,42,45,49,53,55,60,63,65,69–71)                       |
| - II                                                     | 39.0% (1.7–81.9)       | 15 435                                                     | (10,11,14,19,26,28–31,33,37,42,45,46,49,53,55,60,63–65,69–71)                    |
| - III                                                    | 54.0% (7.9–94.0)       | 13 490                                                     | (10,14,19,22,26,28–31,33,42,45,46,49,53,55,59,63–65,70,71)                       |
| - IV                                                     | 4.8% (0–16.3)          | 12 287                                                     | (10,14,19,26,28,29,31,33,42,46,49,53,55,59,64,65,70,71)                          |
| CCI (weighted average, % (range))                        |                        |                                                            |                                                                                  |
| - 0                                                      | 45.6% (6.3–68.1)       | 114 334                                                    | (7,16,20,36,42,50,58,60,70)                                                      |
| - 1                                                      | 26.7% (4.0–30.6)       | 85 875                                                     | (16,20,34,36,50,58,60,70)                                                        |
| - ≥2                                                     | 20.9% (2.5–69.4)       | 88 159                                                     | (16,20,22,34,36,48,52,58,60,64,66,70)                                            |
| Prior abdominal surgery (weighted average, % (range))    | 41.4% (5.1–55.1)       | 4 214                                                      | (8,12,16,18,21,29,35,45,61,62,71)                                                |
| Previous pelvic radiation* (weighted average, % (range)) | 5.5% (1.3–22.1)        | 3 910                                                      | (8,16,18,21,29,33,51,61,62,71)                                                   |
| Neoadjuvant chemotherapy (weighted average, % (range))   | 13.2% (0–50.8)         | 23 678                                                     | (8,10,12,14,16–18,22,25,26,33,35,37,41,45,46,49,53,59,60,62,63,65,68–72)         |
| <b>Perioperative details</b>                             |                        |                                                            |                                                                                  |
| Surgical approach (weighted average, % (range))          |                        | 107 822                                                    | (8,11,13,16–22,25–31,33,35,36,39,41,43,45,47–51,53,54,60,62–64,70–72)            |
| - open                                                   | 86.5% (0–100)          |                                                            |                                                                                  |
| - laparoscopic                                           | 1.8% (0–100)           |                                                            |                                                                                  |

|                                                           |                      |        |                                                                                                              |
|-----------------------------------------------------------|----------------------|--------|--------------------------------------------------------------------------------------------------------------|
| - robot-assisted laparoscopic                             | 10.9% (0–100)        |        |                                                                                                              |
| Type of diversion (weighted average, % (range))           |                      |        |                                                                                                              |
| - ileal conduit                                           | 85.0% (31.4–93.8)    | 80 675 | (8,10–14,16–19,21,22,26,29–31,33,35,36,42–51,53–55,60,61,63–72)                                              |
| - neobladder                                              | 10.5% (2.6–62.1)     | 65 307 | (8,10,12–14,16–19,21,22,26,29–31,33,35,36,42–49,51,53–55,60,61,63–67,69–72)                                  |
| - continent cutaneous diversion                           | 1.25% (0–29.6)       | 59 853 | (8,12–14,16,18,26,29,30,36,43,44,46,48,49,51,54,55,60,61,63,65–67,69,71,72)                                  |
| - ureterocutaneostomy                                     | 1.35% (0–26.7)       | 58 210 | (8,17–19,22,30,31,36,44,47,48,54,60,63,64,66,67,69,72)                                                       |
| - nephrostomy                                             | 0.01% (0–0.5)        | 56 718 | (8,18,19,22,31,36,44,49,51,54,60,63,64,66,67,69,72)                                                          |
| Pathological tumor stage (weighted average, % (range))    |                      |        |                                                                                                              |
| - ≤ T1                                                    | 27.1% (6.4–54.9)     | 31 317 | (10–12,14,15,17–21,25–27,30,31,35,37,42,43,45,46,48,52,54,55,59,60,62–64,71,72)                              |
| - T2                                                      | 29.1% (11.9–56.7)    | 28 916 | (10–12,14,15,17–21,25–27,30,31,35,37,43,45,46,48,49,52,54,55,60,62–64,71)                                    |
| - T3                                                      | 28.5% (10.8–42.4)    | 26 537 | (10,12,14,17–21,25–27,30,31,35,43,46–49,52,54,55,60,62–64,71)                                                |
| - T4                                                      | 13.2% (2.4–25.9)     | 26 537 | (10,12,14,17–21,25–27,30,31,35,43,46–49,52,54,55,60,62–64,71)                                                |
| Lymph node positive disease (weighted average, % (range)) | 19.1% (6.3–44.4)     | 29 615 | (10–12,14–16,18–21,25–27,29–31,35,43,45–49,52,54,60,62–64,71,72)                                             |
| LOS                                                       |                      |        |                                                                                                              |
| - weighted median (%-range))                              | 11 days (4–39)       | 77 038 | (7,10,12–14,16,18,20–22,24,26,28,29,31,33,35,39,40,42,43,45,46,48,50,51,53,55,56,58,59,61–63,65,66,69,71,72) |
| - weighted mean (%-range))                                | 12.5 days (8.2–27.6) | 39 562 | (8,19,25,38,39,44,47,48,50,53,54,58,64,67,68,70)                                                             |

Abbreviations: BMI = Body Mass Index, ASA= American Society of Anesthesiologists, CCI = Charlson Comorbidity Index, LOS= Length of Stay, \*not external beam radiation therapy due to bladder cancer

## Complications

Fifty-two studies reported on short term complications as outlined in table 2. The most frequently reported follow-up period was 90 days. Three studies reporting short term complications did not state the exact

follow-up period and were therefore excluded from the complication rate analysis (33,40,67). During the primary hospitalisation, the overall complication rate was 34.9% (28.8–68.8). The complication rate increased with longer follow-up to 39.0% (27.3–80.0) 30 days, and 58.5% (36.1–80.5) 90 days postoperatively. Minor complications accounted for 40.0% (19.9–77.4) and 38.2% (19.0–80.8) of the complications reported at 30- and 90-days follow-up, respectively. Major complications after RC occurred in 15.5% (4.9–24.8) and 16.9% (13.4–32.0) of patients after 30 and 90 days, respectively. Rates of complications according to the Clavien-Dindo classification and reoperations are further outlined in Table 2.

Table 2. Complications and re-operations.

| Outcome                                     | Complication rate, weighted average (%-range) | Number of patients with data available (sum of references) | References                                                         |
|---------------------------------------------|-----------------------------------------------|------------------------------------------------------------|--------------------------------------------------------------------|
| In-hospital complication rate               | 34.9%* <sup>1</sup> (28.8–68.8)               | 76171                                                      | (19,32,39,50,58,59,61)                                             |
| 30-day complication rate                    | 39.0%* <sup>2</sup> (27.3–80.0)               | 19160                                                      | (9,18,23,28,30,43,44,46,47,51,53,55,60–62,70–72)                   |
| - CD grade I                                | 9.2% (6.0–16.1)                               | 1291                                                       | (30,35,45,70)                                                      |
| - CD grade II                               | 29.8% (20.6–52.5)                             | 1291                                                       | (30,35,45,70)                                                      |
| - CD grade IIIa+b                           | 6.9% (5.6–14.4)                               | 8749                                                       | (28,30,35,45,70)                                                   |
| - CD grade IVa+b                            | 7.8% (0.7–11.0)                               | 8749                                                       | (28,30,35,45,70)                                                   |
| - CD grade V                                | 1.7% (0.0–2.1)                                | 8982                                                       | (28,30,35,45,46,70)                                                |
| - Minor complication rate* <sup>3</sup> (%) | 40.0% (19.9–77.4)                             | 2536                                                       | (13,18,43,44,51,55,60,62)                                          |
| - Major complication rate* <sup>4</sup>     | 15.5% (4.9–24.8)                              | 4499                                                       | (13,18,30,43,44,46,51,55,60,62,70,72)                              |
| 90-day complication rate                    | 58.5* <sup>5</sup> (36.1–80.5)                | 10625                                                      | (8,10,12,14,16,17,21,22,26,29–31,42,48,49,54,59–61,63–65,69,71,72) |
| - CD grade I                                | 15.0% (4.0–31.6)                              | 4442                                                       | (29,30,54,59,61,64,69)                                             |
| - CD grade II                               | 38.9% (27.0–67.4)                             | 4442                                                       | (29,30,54,59,61,64,69,72)                                          |
| - CD grade IIIa+b                           | 20.5% (8.5–39.2)                              | 5548                                                       | (29–31,54,59,61,64,69,72)                                          |
| - CD grade IVa+b                            | 3.0% (0.2–8.5)                                | 5548                                                       | (29–31,54,59,61,64,69,72)                                          |
| - CD grade V                                | 3.5% (0.1–3.9)                                | 55440                                                      | (29–31,36,48,54,59,61,64,69,72)                                    |
| - Minor complication rate* <sup>3</sup>     | 38.2% (19.0–80.8)                             | 56955                                                      | (8,12,16,17,21,26,31,36,42,59–61,63,69)                            |
| - Major complication rate* <sup>4</sup>     | 16.9% (13.4–32.0)                             | 59068                                                      | (8,12,14,16,17,22,26,29–31,36,42,49,59–61,64,69,72)                |
| Reoperation rate                            |                                               |                                                            |                                                                    |
| - 30-day                                    | 5.8% (3.0–8.7)                                | 11598                                                      | (9,21,27,28,30,44–46,53,62,71)                                     |
| - 90-day                                    | 12.3% (9.3–18.9)                              | 1533                                                       | (10,26,30,54,69)                                                   |

\*<sup>1</sup>one study (25) did not report on overall complication rate, \*<sup>2</sup>Three studies (13,35,45) did not report on overall complication rate. \*<sup>3</sup> minor complications defined as Clavien-Dindo grade I–II, MSKCC grade 1–2 or minor complications. \*<sup>4</sup> major complications defined as Clavien-Dindo grade III–V, MSKCC grade 3–5 or major complications. \*<sup>5</sup> one study (36) did not report overall complication rate.



Thirty-four studies (8,10,12,14,16,18,19,22,26,28–31,33,35,36,42,45,46,48,49,54,55,59–64,67,69–72) classified complications according to the Clavien–Dindo classification (73), six (9,13,17,43,44,51) studies classified complications as minor and major complications, three studies (21,27,72) used the Memorial Sloan Kettering Cancer Centre modified Clavien-Dindo classification (61), one study (65) used Common Terminology Criteria for Adverse Events (74), and nine studies (23,25,32,39,40,47,50,53,58) did not use any system for grading complications.

### Type of complications

Twenty-one studies reported on types of 90-day complications (Table 3). Gastrointestinal (GI) (29.0%) and infectious (26.4%) complications were the most frequent.

Table 3. Categories and type of 90-day complications.

| Category/type                   | Rate, weighted average (%-range) | Number of patients with data available (sum of references) | References                                  |
|---------------------------------|----------------------------------|------------------------------------------------------------|---------------------------------------------|
| Gastrointestinal                | 29.0% (6.7–42.7)                 | 6188                                                       | (16,21,22,26,27,30,48,49,54,59,61,69)       |
| - Ileus                         | 16.5% (3.8–33.7)                 | 5073                                                       | (12,14,21,22,30,31,42,48,49,54,61,64,65,69) |
| - Small bowel obstruction       | 4.6% (1.7–9.0)                   | 3193                                                       | (14,21,26,31,48,49,54,61,64,65)             |
| - Constipation                  | 3.3% (0.5–11.4)                  | 2491                                                       | (12,14,22,48,49,61)                         |
| - Clostridium Difficile Colitis | 2.3% (0.7–3.8)                   | 2574                                                       | (21,49,61,64,69)                            |
| - Diarrhoea                     | 1.7% (0.6–5.6)                   | 2392                                                       | (12,22,48,49,54,61)                         |
| - Anastomotic bowel leak        | 1.1% (0.3–1.9)                   | 3254                                                       | (12,21,22,26,61,69)                         |
| - Gastrointestinal bleeding     | 1.0% (0.3–1.3)                   | 2757                                                       | (12,21,22,61,69)                            |
| Infectious                      | 26.4% (10.9–46.2)                | 5270                                                       | (14,16,21,22,26,27,30,48,49,54,61,69)       |
| - UTI/pyelonephritis            | 14.1% (1.1–29.7)                 | 4297                                                       | (12,21,22,26,42,48,49,54,61,64,65,69)       |
| - Sepsis                        | 4.2% (1.5–8.5)                   | 3812                                                       | (21,22,26,42,48,49,54,61,65,69)             |
| - Fever of unknown origin       | 3.1% (0.6–4.8)                   | 2966                                                       | (12,21,22,49,61,69)                         |
| - Pelvic/intraabdominal abscess | 2.4% (0.1–4.3)                   | 2836                                                       | (21,22,48,61,65,69)                         |
| Genitourinary                   | 16.0% (6.0–23.5)                 | 5697                                                       | (17,21,22,27,30,54,59,61,69)                |
| - Ureter stenosis               | 3.2% (1.7–7.0)                   | 2539                                                       | (12,21,22,26,48,61,65)                      |
| - Ureter leakage                | 3.1% (0.4–5.3)                   | 4282                                                       | (12,14,21,22,26,48,49,61,64,65,69)          |
| Wound                           | 13.1% (5.6–27.0)                 | 6424                                                       | (12,16,17,21,22,26,27,30,48,59,64,69)       |
| - Dehiscence                    | 4.0% (1.3–4.9)                   | 2722                                                       | (26,31,49,61,69)                            |
| - Fascial dehiscence            | 1.6% (0.4–3.5)                   | 2139                                                       | (12,21,54,61,65)                            |
| - Infection                     | 10.5% (2.4–19.3)                 | 3827                                                       | (14,21,26,31,42,49,54,61,69)                |
| Cardiac                         | 6.1% (0.6–16.9)                  | 5366                                                       | (12,16,17,21,30,48,49,59,61,64,69)          |
| - Myocardial infarction         | 1.1% (0.2–3.5)                   | 4170                                                       | (12,14,21,26,48,49,54,61,65,69)             |
| - Arrhythmia                    | 4.2% (0.2–14.4)                  | 2923                                                       | (12,21,48,49,61,69)                         |

|                |                  |      |                                          |
|----------------|------------------|------|------------------------------------------|
| Bleeding       | 3.5% (0.5–17.8)  | 2814 | (16,30,61,64,69)                         |
| - Hematoma     | 0.9% (0.7–1.2)   | 1096 | (12,14,65)                               |
| - Transfusion  | 23.2% (8.1–45.3) | 2606 | (12,14,31,48,54,61,64)                   |
| Respiratory    | 5.0% (1.3–11.5)  | 6845 | (12,14,16,17,21,27,30,48,49,54,59,61,69) |
| - Pneumonia    | 2.8% (0.6–5.9)   | 3639 | (12,21,26,31,42,48,54,61,69)             |
| Thromboembolic | 3.6% (0.2–8.1)   | 4933 | (12,14,16,21,26,30,31,48,49,54,61,65,69) |
| Neurological   | 2.8% (0.6–7.7)   | 4557 | (12,16,17,21,27,48,49,54,61,69)          |
| Renal failure  | 2.3% (0.5–6.7)   | 4070 | (12,14,21,22,48,49,61,65,69)             |
| Other          |                  |      |                                          |
| - Fistula      | 1.1% (0.6–1.4)   | 1560 | (12,21,26,48,49,64,65)                   |
| - Lymphocele   | 2.1% (1.3–4.7)   | 3381 | (12,14,21,26,48,49,54,61,64,65)          |

UTI: urinary tract infection

## Mortality

Fifty-three studies were included in the mortality analysis (Table 4). The weighted average for the in-hospital mortality rate was 2.4% (0.9–4.7), the 30-day mortality rate 2.1% (0.0–4.0) and the 90-day mortality rate 4.7% (0.0–7.0). A total of 17 of 53 studies reporting on mortality stated the causes of death with 183 deaths reported (10,16,21,22,26,29–31,35,45,52,53,57,61,64,69,71). The most frequent cause of death was cardiopulmonary events accounting for 30% followed by progression of BC (15%) and sepsis (11%).

Table 4. In-hospital, 30-day, and 90-day mortality.

|                       | Mortality rate, weighted average (%-range) | Number of patients with data available (sum of references) | References                                                                                |
|-----------------------|--------------------------------------------|------------------------------------------------------------|-------------------------------------------------------------------------------------------|
| In-hospital mortality | 2.4% (0.9–4.7)                             | 87848                                                      | (32,41,50,56,58,61,66)                                                                    |
| 30-day mortality      | 2.1% (0.0–3.7)                             | 61299                                                      | (7–9,13–15,20,24,28,30,33,35,37,38,41,43–46,51,53,57,60–62,69–72)                         |
| 90-day mortality      | 4.7% (0.0–7.0)                             | 108717                                                     | (7,8,10–12,14,16,17,20–22,24,26,29–31,33,36–38,41,48,49,52,54,56,59–62,64,65,67–69,71,72) |

## Quality of studies

Only three of the included studies (22,61,75) met 10 of 10 Martin criteria (Appendix 2). The median number of fulfilled Martin criteria was 6 (range 2–10). The only criterion fulfilled by all studies was defining the method of accruing data. The level of evidence according to criteria from the Oxford Centre for Evidence-Based Medicine was rated as 3 or 4. The methodological quality across studies was “poor” to “good” assessed using the NOS (Appendix 2).

## DISCUSSION

We systematically reviewed the literature to accurately describe short-term morbidity and mortality following RC and identify modifiable risk factors associated with these. The aim was to identify factors that could form the basis for the design of future randomised trials on postoperative interventions that can reduce the risk of complications.

### Main results

RC is an extensive urological procedure and associated with a high risk of short-term minor and major morbidity. Mortality within 90-days of primary surgery is not negligible and occurs in 4.7% according to our review. Our systematic review underlines that complications occur in 1 in 3 patients during hospitalization and that 1 in 5 patients have major complications during the first 30 days after RC. This emphasizes the continuous need to identify and moderate risk factors for complications and optimize postoperative management plans to reduce both morbidity and mortality associated with RC.

Our analysis identified GI and infectious complications as the most frequently reported complications after RC. Overall, GI complications occurred in 29.0% with a postoperative ileus rate of 15.6%. Urinary tract infections (UTI) were the most frequently occurring infectious complications occurring in 14.1% of patients.

### Risk factors for the development of GI complications

Based on the literature reviewed, it was not possible to identify the most important risk factors for GI complications and thus define whether these were potentially modifiable. The risk of ileus, which is often most clinically relevant, seems to be affected by many factors, most importantly increasing age. One study reported an increasing age as a statistically significant risk factor for ileus with an odds ratio (OR) of 1.30 (95% CI 1.1–1.5) per 10-year increase of age (23). This finding is supported by a large retrospective study (not included in this review) of 41 498 patients that found an increased OR of developing ileus with per one year increment in age (OR 1.012, 95% CI 1.009–1.014,  $p < 0.05$ ) (76). The study also found that the risk of ileus increased with several chronic conditions such as chronic pulmonary and neurological disease. This underlines that reducing GI complication rates relies primarily on an overall medical assessment and that alternative treatment options should be considered in medically ill patients. Surgeons performing RC must be aware that poor general health status increases the risk of GI complications and entails a poor short-term outcome. Several studies of RC have promoted the implementation of ERAS protocols, which originate from colorectal surgery where ERAS reduces GI complications. In this review, no studies investigated the impact on GI complications with the use of an ERAS protocol versus a non-ERAS protocol in the perioperative care. Generally, there is limited evidence for ERAS in an RC setting (77). Only the use of postoperative gum-chewing, the use of Alvimopan (a peripherally acting  $\mu$ -opioid receptor antagonist currently not available in Europe) and controlled administration of perioperative fluid management (goal-directed fluid therapy) to avoid both fluid excess and hypovolemia have been shown to reduce GI complications after RC in randomised clinical trials (RCT) (78–80). Comparative studies indicate that omitting the nasogastric tube and mechanical bowel preparation result in lower GI complications after RC (81,82). ERAS offers good practical guidelines, but the various elements such as early mobilization, omitting pelvic drainage, perioperative body temperature monitoring, and early oral diet are not studied individually but introduced in different modified versions with several components used together. Consequently, it is

1  
2  
3  
4 difficult to derive which factor has the largest impact on reducing GI complications. Four studies in this  
5 review investigated the impact on overall complications, but the results were conflicting (33,39,67,69). A  
6 meta-analysis of ERAS protocols versus traditional protocols have found a faster return of bowel function  
7 and lower overall complication rate in the group managed on an ERAS compared to a standard of care  
8 protocol, but the overall level of evidence in RC remains low with regard to ERAS implementation (83,84). A  
9 previous study described that only 20% of surgeons that endorse ERAS guidelines actually practised all  
10 interventions recommended by the ERAS society (85).  
11  
12  
13

#### 14 **Risk factors for the development of infectious complications**

15  
16 The anatomical reconstruction of the urinary tract with the use of bowel as urinary diversion following RC  
17 will naturally increase the risk of UTI, which can prolong LOS and is leading to re-admittance. Only three of  
18 the included studies identified multivariable risk factors that were statistically significant predictors of  
19 infectious complications 30 and 90 days after RC (23,28,49). Two studies found that continent reservoirs  
20 were associated with a higher risk of UTI compared to ileal conduits. Johnson et al. found that any  
21 continent urinary diversion increased the risk of infectious complications compared to an incontinent  
22 urinary diversion (OR 1.68,  $p < 0.001$ ) (28). Nazmy et al. found that an Indiana pouch increased the risk of UTI  
23 compared to ileal conduit (OR 3.55, 95% CI 1.33–9.44,  $p = 0.01$ ), however, an orthotopic bladder substitute  
24 did not increase the risk of UTI compared to an ileal conduit (49). Other studies not included in this review  
25 investigating this association have shown conflicting results (86–89). Hollenbeck et al. found preoperative  
26 bleeding disorder, poor functional status, preoperative acute renal failure, and a  $>10\%$  weight loss  
27 preoperatively to be associated with an increased risk of UTI (23). In general, the comorbid patient may be  
28 at the highest risk for UTI. A large retrospective study of 1133 patients found that a CCI  $> 2$  was associated  
29 with a higher 90-day postoperative UTI rate (OR = 1.8, 95% CI 1.1–2.9,  $p = 0.05$ ) compared to a CCI 0–2 (86).  
30 It remains unclear if UTI can be prevented. No studies in this review investigated this question which in  
31 general is not well-investigated. Pariser et al. demonstrated that a change in prophylactic antibiotic  
32 protocol from a narrow to a broader coverage did not reduce the UTI rate, although the 30-day risk of  
33 overall infectious complications was reduced following RC from 41% to 30% ( $p = 0.043$ ) (90). A population-  
34 based American study reported a lower infectious event rate when using a combination of antibiotic  
35 prophylaxis compared to a single agent antibiotic (OR 0.79, 95% CI 0.70–0.89,  $p < 0.001$ ) (91). The authors  
36 also investigated if extended antibiotic treatment  $> 24$  h after RC decreased the risk of infectious  
37 complications, but no such association was found. Currently, international guidelines recommend that  
38 broad-spectrum antibiotics are used in the prophylactic regimen considering the local microbiological  
39 environment (92,93). However, RCTs addressing antibiotic prophylaxis regarding type, timing and duration  
40 for the risk of UTI are lacking and warranted.  
41  
42  
43  
44  
45  
46  
47  
48

#### 49 **Risk factors for mortality**

50  
51 In several studies, patient-related factors, age and comorbidity, were identified as the most important  
52 factors for mortality at index hospitalization, as well as 30- and 90 days following surgery  
53 (11,17,24,27,32,38,41,52,66,68).  
54  
55

#### 56 **Other risk factors**

1  
2  
3  
4 In addition to patient-related factors, the impact of hospital volume, surgical experience, and surgical  
5 technique has been addressed. Studies included in this review investigating the impact of hospital volume  
6 has shown conflicting results (15,32,34,37,41,56,66). However, a previous meta-analysis of studies not all  
7 included in the present review found that the risk of postoperative mortality after RC was decreased by  
8 45% when performed at a high-volume centre compared to a low volume centre (pooled estimated effect  
9 OR 0.55 (95% CI 0.44–0.69)) (94). Studies also show that complications are reduced with both increasing  
10 hospital and surgeon volume (32,36). Unfortunately, the distinction between low- vs high-volume is not  
11 well-defined and thus not comparable between studies. The European Association of Urology (EAU)  
12 Muscle-invasive and Metastatic Bladder Cancer Guideline Panel recommends RC to be performed at  
13 centres with at least 10 RC/year and preferably >20 RC/year (95). The surgical technique has been  
14 investigated in 12 of the included studies in this review (18,20,29,31,33,35,45,48,62,64). Open RC was  
15 compared to robotic-assisted RC in ten of these non-randomised papers. In seven of these publications, a  
16 significantly reduced complication rate was found. However, five RCTs comparing open and robotic surgery  
17 (not included in the review) did not find a difference in complication rates (96–100). All RCTs have been  
18 conducted with extracorporeal urinary diversion performed and it is speculated that robot-assisted RC with  
19 intracorporeal urinary diversion may have a lower complication rate compared to open RC. The question in  
20 hand is currently being studied in the ongoing iROC trial (101).

### 26 27 **Limitations**

28  
29 There are limitations of this review that must be addressed. Most of the included studies were  
30 retrospective which limits the clinical utility. It is important to notice that we excluded studies with less  
31 than 100 patients and studies investigating subgroups of patients such as certain age groups, types of  
32 urinary diversion or T-stages of BC. Since most RCTs on RC have less than 100 participants and often  
33 exclude patients with certain characteristics they were not included in this review.

### 36 37 **Challenges in the comparison of RC studies**

38  
39 The difficulties of comparing RC studies are manifold. Firstly, selection bias between cohorts must be  
40 expected. This is reflected by the wide range for the estimates of the weighted averages for ASA score and  
41 CCI (Table 1). The selection of patients fit for RC is known to be associated with great variation among  
42 centres (102). Secondly, there was no standardized reporting of complications. Most used different  
43 classification systems for severity grade of complications with the Clavien-Dindo classification being the  
44 most frequent. Thirdly, even when using a grading system as Clavien-Dindo with certain criteria, the scale  
45 can be interpreted differently or modified in some way. For example, some studies do not calculate blood  
46 transfusions as a complication even though it could be argued to be a grade II complication. Fourthly,  
47 measures of morbidity can be defined differently across studies. For example, ileus is reported in up to 20%  
48 of patients undergoing RC. However, the reporting of ileus may be questioned as a previous systematic  
49 review found that ileus was defined differently across studies, and in the majority of included studies it was  
50 not defined at all (103). There is an increased focus on more uniform reporting of morbidity following RC  
51 and the EAU have proposed authors to use quality criteria originally proposed by Martin et al. (4,104). In  
52 the present review, only three studies fulfilled all the Martin criteria. A previous non-systematic review  
53 from 2007 found no study reporting on complications after RC fulfilling all the Martin criteria. Lastly,  
54 publication bias must be emphasized as an important limitation.

1  
2  
3  
4 We refrained from a meta-analysis of predictors of morbidity and mortality in this review as the number of  
5 studies investigating the same risk variable and outcome were too small for analysis. Identifying clinical  
6 predictors may aid in the prevention of postoperative morbidity and mortality. Currently, there is no risk-  
7 assessment tool to predict postoperative outcomes after RC, and little correlation is found between the  
8 most frequently used risk-scoring systems (e.g. CCI and ASA score) and postoperative outcomes (70).  
9 Nevertheless, in the included studies of this review, comorbidity was in multivariate logistic regression  
10 analysis consistently associated with a significantly increased OR of both complications  
11 (12,17,22,23,32,49,51,58,60,61,72) and mortality (11,17,24,32,41,52,66). Surprisingly, there is a paucity of  
12 prospective studies studying the subjects of the most common complications after RC in order to identify  
13 clinical predictors of these. Furthermore, prospective randomised studies comparing different  
14 interventions/regimens are lacking.  
15  
16  
17  
18  
19  
20

## 21 **CONCLUSION**

22  
23 This review shows that RC is associated with a high risk of morbidity and mortality. However, with thorough  
24 patient selection, experienced surgeons, treatment at a high-volume hospital and the implementation of an  
25 ERAS protocol morbidity and mortality can likely be reduced. Trials addressing medical or surgical  
26 interventions to reduce short-term complication are needed.  
27  
28  
29  
30

## 31 **FUNDING**

32  
33 This work was supported by the Department of Urology, Rigshospitalet and Rigshospitalet's Research  
34 Committee. Rigshospitalet's Research Committee did not have any role in the design, the analyses, the  
35 interpretation of data, or in the decision to submit results.  
36  
37

## 38 **COMPETING INTERESTS**

39  
40 None declared.  
41

## 42 **AUTHORS CONTRIBUTIONS**

43  
44 S.L.M., U.N.J., A.M.P., H.K., K.B., M.A.R. contributed to the research idea and the question. S.L.M., U.N.J.,  
45 and M.A.R. wrote the protocol. S.L.M. and M.A.R. screened all abstracts and full texts for inclusion. S.L.M.  
46 did all the data extraction and statistics. S.L.M. drafted the manuscript and U.N.J., A.M.P., H.K., K.B., M.A.R.  
47 contributed to the editing of the manuscript and approved the final manuscript.  
48

## 49 **DATA AVAILABILITY STATEMENT**

50  
51 Data are stored and available from the corresponding author (S.L.M.) upon reasonable request and can be  
52 reused without any further permission.  
53  
54  
55  
56  
57  
58  
59  
60

## REFERENCES

1. Alfred Witjes J, Lebret T, Compérat EM, et al. Updated 2016 EAU Guidelines on Muscle-invasive and Metastatic Bladder Cancer. *Eur Urol*. 2017 Mar;71(3):462–75.
2. Moher D, Shamseer L, Clarke M, et al. Preferred reporting items for systematic review and meta-analysis protocols (PRISMA-P) 2015 statement. *Syst Rev*. 2015 Jan 1;4(1):1.
3. Covidence Systematic Review Software [Internet]. Veritas Health Innovation Ltd, Melbourne, Australia. Available from: [www.covidence.org](http://www.covidence.org)
4. Martin RCG, Brennan MF, Jaques DP. Quality of complication reporting in the surgical literature. *Ann Surg*. 2002 Jun;235(6):803–13.
5. Howick J, Chalmers I, Glasziou P, Greenhalgh T, Heneghan C, Liberati, Alessandro Moschetti I, et al. OCEBM Levels of Evidence Working Group. “The Oxford 2011 Levels of Evidence”. Oxford Centre for Evidence-Based Medicine. [Internet]. Available from: <http://www.cebm.net/index.aspx?o=5653>
6. Wells G, Shea B, O’Connell D, et al. The Newcastle-Ottawa Scale (NOS) for assessing the quality of nonrandomised studies in meta-analyses [Internet]. [cited 2020 May 6]. Available from: [http://www.ohri.ca/programs/clinical\\_epidemiology/oxford.asp](http://www.ohri.ca/programs/clinical_epidemiology/oxford.asp)
7. Afshar M, Goodfellow H, Jackson-Spence F, et al. Centralisation of radical cystectomies for bladder cancer in England, a decade on from the “Improving Outcomes Guidance”: the case for super centralisation. *BJU Int*. 2018 Feb;121(2):217–24.
8. Al-Daghmin A, Kauffman EC, Shi Y, et al. Efficacy of robot-assisted radical cystectomy (RARC) in advanced bladder cancer: results from the International Radical Cystectomy Consortium (IRCC). *BJU Int*. 2014 Jul;114(1):98–103.
9. Arora K, Hanson KT, Habermann EB, Tollefson MK, Psutka SP. Early Complications and Mortality following Radical Cystectomy: Associations with Malnutrition and Obesity. *Bl cancer* (Amsterdam, Netherlands). 2018 Oct;4(4):377–88.
10. Björnsson O, Gudmundsson EO, Marteinsson VT, et al. Radical cystectomy in the treatment of bladder cancer in Iceland: A population-based study. *Scand J Urol*. 2016 Jan 2;50(1):65–70.
11. Boorjian SA, Kim SP, Tollefson MK, et al. Comparative performance of comorbidity indices for estimating perioperative and 5-year all cause mortality following radical cystectomy for bladder cancer. *J Urol*. 2013 Jul;190(1):55–60.
12. Cantiello F, Cicione A, Autorino R, et al. Metabolic Syndrome, Obesity, and Radical Cystectomy Complications: A Clavien Classification System-Based Analysis. *Clin Genitourin Cancer*. 2014 Oct;12(5):384–93.
13. Chang SS, Cookson MS, Baumgartner RG, Wells N, Smith JA. Analysis of early complications after radical cystectomy: results of a collaborative care pathway. *J Urol*. 2002 May;167(5):2012–6.
14. De Nunzio C, Cindolo L, Leonardo C, et al. Analysis of radical cystectomy and urinary diversion complications with the Clavien classification system in an Italian real life cohort. *Eur J Surg Oncol*. 2013 Jul;39(7):792–8.
15. de Vries RR, Visser O, Nieuwenhuijzen JA, Horenblas S. Outcome of treatment of bladder cancer: a

- 1  
2  
3  
4 comparison between low-volume hospitals and an oncology centre. *World J Urol.* 2010  
5 Aug;28(4):431–7.  
6
- 7  
8 16. Djaladat H, Katebian B, Bazargani ST, et al. 90-Day complication rate in patients undergoing radical  
9 cystectomy with enhanced recovery protocol: a prospective cohort study. *World J Urol.* 2017 Jun  
10 12;35(6):907–11.  
11
- 12 17. Fairey A, Chetner M, Metcalfe J, et al. Associations Among Age, Comorbidity and Clinical Outcomes  
13 After Radical Cystectomy: Results From the Alberta Urology Institute Radical Cystectomy Database. *J*  
14 *Urol.* 2008 Jul;180(1):128–34.  
15
- 16 18. Flamiatos JF, Chen Y, Lambert WE, et al. Open versus robot-assisted radical cystectomy: 30-day  
17 perioperative comparison and predictors for cost-to-patient, complication, and readmission. *J Robot*  
18 *Surg.* 2019 Feb;13(1):129–40.  
19
- 20 19. Gschliesser T, Eredics K, Berger I, et al. The Impact of Gender on Tumour Stage in In-House  
21 Complications and Choice of Urinary Diversion: Results of the Austrian Cystectomy Registry. *Urol Int.*  
22 2017;99(4):429–35.  
23
- 24 20. Hanna N, Leow JJ, Sun M, et al. Comparative effectiveness of robot-assisted vs. open radical  
25 cystectomy. *Urol Oncol.* 2018 Mar;36(3):88.e1-88.e9.  
26
- 27 21. Hayn MH, Hellenthal NJ, Hussain A, Stegemann AP, Guru KA. Defining Morbidity of Robot-Assisted  
28 Radical Cystectomy Using a Standardized Reporting Methodology. *Eur Urol.* 2011 Feb;59(2):213–8.  
29
- 30 22. Hirobe M, Tanaka T, Shindo T, et al. Complications within 90 days after radical cystectomy for  
31 bladder cancer: results of a multicenter prospective study in Japan. *Int J Clin Oncol.* 2018 Aug  
32 13;23(4):734–41.  
33
- 34 23. Hollenbeck BK, Miller DC, Taub D, et al. Identifying risk factors for potentially avoidable  
35 complications following radical cystectomy. *J Urol.* 2005 Oct;174(4 Pt 1):1231–7.  
36
- 37 24. Hollenbeck BK, Miller DC, Taub DA, et al. The Effects of Adjusting for Case Mix on Mortality and  
38 Length of Stay Following Radical Cystectomy. *J Urol.* 2006 Oct;176(4):1363–8.  
39
- 40 25. Hu JC, Chughtai B, O'Malley P, et al. Perioperative Outcomes, Health Care Costs, and Survival After  
41 Robotic-assisted Versus Open Radical Cystectomy: A National Comparative Effectiveness Study. *Eur*  
42 *Urol.* 2016 Jul;70(1):195–202.  
43
- 44 26. Jerlström T, Gårdmark T, Carringer M, et al. Urinary bladder cancer treated with radical cystectomy:  
45 Perioperative parameters and early complications prospectively registered in a national population-  
46 based database. *Scand J Urol.* 2014 Aug 21;48(4):334–40.  
47
- 48 27. Johar RS, Hayn MH, Stegemann AP, et al. Complications After Robot-assisted Radical Cystectomy:  
49 Results from the International Robotic Cystectomy Consortium. *Eur Urol.* 2013 Jul;64(1):52–7.  
50
- 51 28. Johnson SC, Smith ZL, Golan S, Rodriguez JF, Smith ND, Steinberg GD. Temporal trends in  
52 perioperative morbidity for radical cystectomy using the National Surgical Quality Improvement  
53 Program database. *Urol Oncol Semin Orig Investig.* 2017 Nov;35(11):659.e13-659.e19.  
54
- 55 29. Kader AK, Richards KA, Krane LS, Pettus JA, Smith JJ, Hemal AK. Robot-assisted laparoscopic vs open  
56 radical cystectomy: comparison of complications and perioperative oncological outcomes in 200  
57 patients. *BJU Int.* 2013 Aug;112(4):E290–4.  
58  
59  
60



1  
2  
3  
4  
5  
6  
7  
8  
9  
10  
11  
12  
13  
14  
15  
16  
17  
18  
19  
20  
21  
22  
23  
24  
25  
26  
27  
28  
29  
30  
31  
32  
33  
34  
35  
36  
37  
38  
39  
40  
41  
42  
43  
44  
45  
46  
47  
48  
49  
50  
51  
52  
53  
54  
55  
56  
57  
58  
59  
60

30. Kanno T, Ito K, Sawada A, et al. Complications and reoperations after laparoscopic radical cystectomy in a Japanese multicenter cohort. *Int J Urol*. 2019 Apr;26(4):493–8.
31. Khan MS, Challacombe B, Elhage O, et al. A dual-centre, cohort comparison of open, laparoscopic and robotic-assisted radical cystectomy. *Int J Clin Pract*. 2012 Jul;66(7):656–62.
32. Kim SP, Boorjian SA, Shah ND, et al. Contemporary trends of in-hospital complications and mortality for radical cystectomy. *BJU Int*. 2012 Oct;110(8):1163–8.
33. Koupparis A, Villeda-Sandoval C, Weale N, El-Mahdy M, Gillatt D, Rowe E. Robot-assisted radical cystectomy with intracorporeal urinary diversion: impact on an established enhanced recovery protocol. *BJU Int*. 2015 Dec;116(6):924–31.
34. Kulkarni GS, Urbach DR, Austin PC, Fleshner NE, Laupacis A. Impact of provider volume on operative mortality after radical cystectomy in a publicly funded healthcare system. *Can Urol Assoc J*. 2013;7(11–12):425–9.
35. Lenfant L, Campi R, Parra J, et al. Robotic versus open radical cystectomy throughout the learning phase: insights from a real-life multicenter study. *World J Urol*. 2019 Nov;
36. Leow JJ, Reese S, Trinh Q-D, et al. Impact of surgeon volume on the morbidity and costs of radical cystectomy in the USA: a contemporary population-based analysis. *BJU Int*. 2015 May;115(5):713–21.
37. Liedberg F, Holmberg E, Holmäng S, et al. Long-term follow-up after radical cystectomy with emphasis on complications and reoperations: A Swedish population-based survey. *Scand J Urol Nephrol*. 2012 Feb 19;46(1):14–8.
38. Lin W-Y, Wu C-T, Chen M-F, Chang Y-H, Lin C-L, Kao C-H. Cystectomy for bladder cancer in elderly patients is not associated with increased 30- and 90-day mortality or readmission, length of stay, and cost: propensity score matching using a population database. *Cancer Manag Res*. 2018;10:1413–8.
39. Liu B, Domes T, Jana K. Evaluation of an enhanced recovery protocol on patients having radical cystectomy for bladder cancer. *Can Urol Assoc J*. 2018 Jul;12(12):421–6.
40. Llorente C, Lopez B, Hernandez V, Guijarro A, Perez-Fernandez E. Variability in complications and operative mortality after radical cystectomy in Spain. *Actas Urol Esp*. 2017 Jan;41(1):32–8.
41. Llorente C, Guijarro A, Hernandez V, Fernández-Conejo G, Perez-Fernandez E, Pocock S. Effect of hospital volume on 90-day mortality after radical cystectomy for bladder cancer in Spain. *World J Urol*. 2020 May;38(5):1221–8.
42. Llorente C, Guijarro A, Hernández V, et al. Outcomes of an enhanced recovery after radical cystectomy program in a prospective multicenter study: compliance and key components for success. *World J Urol*. 2020 Mar;
43. Lowrance WT, Rumohr JA, Chang SS, Clark PE, Smith JA, Cookson MS. Contemporary open radical cystectomy: analysis of perioperative outcomes. *J Urol*. 2008 Apr;179(4):1313–8.
44. Malavaud B, Vaessen C, Mouzin M, Rischmann P, Sarramon J, Schulman C. Complications for radical cystectomy. Impact of the American Society of Anesthesiologists score. *Eur Urol*. 2001 Jan;39(1):79–84.

- 1
- 2
- 3
- 4 45. Mazzone E, D'Hondt F, Beato S, et al. Robot-assisted radical cystectomy with intracorporeal urinary diversion decreases postoperative complications only in highly comorbid patients: findings that rely on a standardized methodology recommended by the European Association of Urology Guidelines. *World J Urol.* 2020 May;
- 5
- 6
- 7
- 8
- 9
- 10 46. Monn MF, Kaimakliotis HZ, Cary KC, et al. Short-term morbidity and mortality of Indiana pouch, ileal conduit, and neobladder urinary diversion following radical cystectomy. *Urol Oncol Semin Orig Investig.* 2014 Nov;32(8):1151–7.
- 11
- 12
- 13
- 14 47. Moschini M, Gandaglia G, Dell'Oglio P, et al. Incidence and Predictors of 30-Day Readmission in Patients Treated With Radical Cystectomy: A Single Center European Experience. *Clin Genitourin Cancer.* 2016 Aug;14(4):e341-6.
- 15
- 16
- 17
- 18 48. Musch M, Janowski M, Steves A, et al. Comparison of early postoperative morbidity after robot-assisted and open radical cystectomy: results of a prospective observational study. *BJU Int.* 2014 Mar;113(3):458–67.
- 19
- 20
- 21
- 22 49. Nazmy M, Yuh B, Kawachi M, et al. Early and Late Complications of Robot-Assisted Radical Cystectomy: A Standardized Analysis by Urinary Diversion Type. *J Urol.* 2014 Mar;191(3):681–7.
- 23
- 24
- 25 50. Nazzani S, Mazzone E, Preisser F, et al. Comparison of Perioperative Outcomes Between Open and Robotic Radical Cystectomy: A Population-Based Analysis. *J Endourol.* 2018 Aug;32(8):701–9.
- 26
- 27
- 28 51. Nieuwenhuijzen JA, de Vries RR, Bex A, et al. Urinary Diversions after Cystectomy: The Association of Clinical Factors, Complications and Functional Results of Four Different Diversions. *Eur Urol.* 2008 Apr;53(4):834–44.
- 29
- 30
- 31
- 32 52. Novotny V, Froehner M, Koch R, et al. Age, American Society of Anesthesiologists physical status classification and Charlson score are independent predictors of 90-day mortality after radical cystectomy. *World J Urol.* 2016 Aug;34(8):1123–9.
- 33
- 34
- 35 53. Novotny V, Hakenberg OW, Wiessner D, et al. Perioperative Complications of Radical Cystectomy in a Contemporary Series. *Eur Urol.* 2007 Feb;51(2):397–402.
- 36
- 37
- 38 54. Patidar N, Yadav P, Sureka SK, Mittal V, Kapoor R, Mandhani A. An audit of early complications of radical cystectomy using Clavien-Dindo classification. *Indian J Urol.* 2016;32(4):282–7.
- 39
- 40
- 41 55. Peyton CC, Reich RR, Tang D, et al. Identifying and Codifying Complications after Radical Cystectomy: Comparison of Administrative Diagnostic and Procedure Codes, and Clinical Chart Review. *J Urol.* 2019 Nov;202(5):913–9.
- 42
- 43
- 44
- 45 56. Porter MP, Gore JL, Wright JL. Hospital volume and 90-day mortality risk after radical cystectomy: a population-based cohort study. *World J Urol.* 2011 Feb;29(1):73–7.
- 46
- 47
- 48 57. Quek ML, Stein JP, Daneshmand S, et al. A Critical Analysis of Perioperative Mortality From Radical Cystectomy. *J Urol.* 2006 Mar;175(3):886–90.
- 49
- 50
- 51 58. Roghmann F, Sukumar S, Ravi P, et al. Radical Cystectomy in the Elderly: National Trends and Disparities in Perioperative Outcomes and Quality of Care. *Urol Int.* 2014;92(1):27–34.
- 52
- 53
- 54 59. Salminen AP, Koskinen I, Perez IM, et al. Neoadjuvant Chemotherapy Does Not Increase the Morbidity of Radical Cystectomy: A 10-year Retrospective Nationwide Study. *Eur Urol Oncol.* 2018 Dec;1(6):525–30.
- 55
- 56
- 57
- 58
- 59
- 60

1  
2  
3  
4  
5  
6  
7  
8  
9  
10  
11  
12  
13  
14  
15  
16  
17  
18  
19  
20  
21  
22  
23  
24  
25  
26  
27  
28  
29  
30  
31  
32  
33  
34  
35  
36  
37  
38  
39  
40  
41  
42  
43  
44  
45  
46  
47  
48  
49  
50  
51  
52  
53  
54  
55  
56  
57  
58  
59  
60

60. Schmid M, Rink M, Traumann M, et al. Evidence from the “PROspective MultiCEnTer Radical Cystectomy Series 2011 (PROMETRICS 2011)” Study: How are Preoperative Patient Characteristics Associated with Urinary Diversion Type After Radical Cystectomy for Bladder Cancer? *Ann Surg Oncol*. 2015 Mar 28;22(3):1032–42.
61. Shabsigh A, Korets R, Vora KC, et al. Defining Early Morbidity of Radical Cystectomy for Patients with Bladder Cancer Using a Standardized Reporting Methodology. *Eur Urol*. 2009 Jan;55(1):164–76.
62. Styn NR, Montgomery JS, Wood DP, et al. Matched Comparison of Robotic-assisted and Open Radical Cystectomy. *Urology*. 2012 Jun;79(6):1303–9.
63. Su S, Gu L, Ma X, et al. Comparison of Laparoscopic and Robot-assisted Radical Cystectomy for Bladder Cancer: Perioperative and Oncologic Outcomes. *Clin Genitourin Cancer*. 2019 Oct;17(5):e1048–53.
64. Sung HH, Ahn J-S, Seo S II, et al. A Comparison of Early Complications Between Open and Robot-Assisted Radical Cystectomy. *J Endourol*. 2012 Jun;26(6):670–5.
65. Svatek RS, Fisher MB, Matin SF, et al. Risk Factor Analysis in a Contemporary Cystectomy Cohort Using Standardized Reporting Methodology and Adverse Event Criteria. *J Urol*. 2010 Mar;183(3):929–34.
66. Udovicich C, Perera M, Huq M, Wong L-M, Lenaghan D. Hospital volume and perioperative outcomes for radical cystectomy: a population study. *BJU Int*. 2017 May;119 Suppl:26–32.
67. Wei C, Wan F, Zhao H, Ma J, Gao Z, Lin C. Application of enhanced recovery after surgery in patients undergoing radical cystectomy. *J Int Med Res*. 2018 Dec;46(12):5011–8.
68. Wissing MD, Santos F, Zakaria AS, et al. Short- and long-term survival has improved after radical cystectomy for bladder cancer in Québec during the years 2000-2015. *J Surg Oncol*. 2019 Jun;119(8):1135–44.
69. Takada N, Abe T, Shinohara N, et al. Peri-operative morbidity and mortality related to radical cystectomy: a multi-institutional retrospective study in Japan. *BJU Int*. 2012 Dec;110(11b):E756–64.
70. Woldu SL, Sanli O, Clinton TN, Lotan Y. Validating the predictors of outcomes after radical cystectomy for bladder cancer. *Cancer*. 2019 Jan 15;125(2):223–31.
71. Xylinas E, Green DA, Otto B, et al. Robotic-assisted Radical Cystectomy With Extracorporeal Urinary Diversion for Urothelial Carcinoma of the Bladder: Analysis of Complications and Oncologic Outcomes in 175 Patients With a Median Follow-up of 3 Years. *Urology*. 2013 Dec;82(6):1323–9.
72. Zhang JH, Ericson KJ, Thomas LJ, et al. Large Single Institution Comparison of Perioperative Outcomes and Complications of Open Radical Cystectomy, Intracorporeal Robot-Assisted Radical Cystectomy and Robotic Extracorporeal Approach. *J Urol*. 2020 Mar;203(3):512–21.
73. Clavien PA, Barkun J, de Oliveira ML, et al. The Clavien-Dindo Classification of Surgical Complications. *Ann Surg*. 2009 Aug;250(2):187–96.
74. Trotti A, Colevas AD, Setser A, et al. CTCAE v3.0: Development of a comprehensive grading system for the adverse effects of cancer treatment. *Semin Radiat Oncol*. 2003;13(3):176–81.
75. Hayn MH, Hellenthal NJ, Seixas-Mikelus SA, et al. Is patient outcome compromised during the initial

- 1  
2  
3  
4 experience with robot-assisted radical cystectomy? Results of 164 consecutive cases. *BJU Int*. 2011  
5 Jan;108(6):no-no.  
6  
7  
8 76. Nutt M, Scaief S, Dynda D, Alanee S. Ileus and small bowel obstruction after radical cystectomy for  
9 bladder cancer: Analysis from the Nationwide Inpatient Sample. *Surg Oncol*. 2018 Sep;27(3):341–5.  
10  
11 77. Cerantola Y, Valerio M, Persson B, et al. Guidelines for perioperative care after radical cystectomy  
12 for bladder cancer: Enhanced Recovery After Surgery (ERAS®) society recommendations. *Clin Nutr*.  
13 2013 Dec;32(6):879–87.  
14  
15 78. Pillai P, McEleavy I, Gaughan M, et al. A Double-Blind Randomized Controlled Clinical Trial to Assess  
16 the Effect of Doppler Optimized Intraoperative Fluid Management on Outcome Following Radical  
17 Cystectomy. *J Urol*. 2011 Dec;186(6):2201–6.  
18  
19 79. Choi H, Kang SHSG, Yoon DK, et al. Chewing Gum Has a Stimulatory Effect on Bowel Motility in  
20 Patients After Open or Robotic Radical Cystectomy for Bladder Cancer: A Prospective Randomized  
21 Comparative Study. *Urology*. 2011 Apr;77(4):884–90.  
22  
23 80. Lee CT, Chang SS, Kamat AM, et al. Alvimopan Accelerates Gastrointestinal Recovery After Radical  
24 Cystectomy: A Multicenter Randomized Placebo-Controlled Trial. *Eur Urol*. 2014 Aug;66(2):265–72.  
25  
26 81. Inman BA, Harel F, Tiguert R, Lacombe L, Fradet Y. Routine Nasogastric Tubes Are Not Required  
27 Following Cystectomy With Urinary Diversion: A Comparative Analysis of 430 Patients. *J Urol*. 2003  
28 Nov;170(5):1888–91.  
29  
30 82. Shafii M, Murphy DM, Donovan MG, Hickey DP. Is mechanical bowel preparation necessary in  
31 patients undergoing cystectomy and urinary diversion? *BJU Int*. 2002 May 12;89(9):879–81.  
32  
33 83. Wessels F, Lenhart M, Kowalewski KF, et al. Early recovery after surgery for radical cystectomy:  
34 comprehensive assessment and meta-analysis of existing protocols. *World J Urol*. 2020 Mar 2;  
35  
36 84. Williams SB, Cumberbatch MGK, Kamat AM, et al. Reporting Radical Cystectomy Outcomes  
37 Following Implementation of Enhanced Recovery After Surgery Protocols: A Systematic Review and  
38 Individual Patient Data Meta-analysis. *Eur Urol*. 2020;1–12.  
39  
40 85. Baack Kukreja JE, Messing EM, Shah JB. Are we doing “better”? The discrepancy between perception  
41 and practice of enhanced recovery after cystectomy principles among urologic oncologists. *Urol*  
42 *Oncol*. 2016 Mar;34(3):120.e17-21.  
43  
44 86. Clifford TG, Katebian B, Van Horn CM, et al. Urinary tract infections following radical cystectomy and  
45 urinary diversion: a review of 1133 patients. *World J Urol*. 2018 May 25;36(5):775–81.  
46  
47 87. van Hemelrijck M, Thorstenson A, Smith P, Adolfsson J, Akre O. Risk of in-hospital complications  
48 after radical cystectomy for urinary bladder carcinoma: population-based follow-up study of 7608  
49 patients. *BJU Int*. 2013 Dec;112(8):1113–20.  
50  
51 88. Kolwijck E, Seegers AEM, Tops SCM, Heijden AG van der, Sedelaar JPM, Oever J ten. Incidence and  
52 microbiology of postoperative infections after radical cystectomy and ureteral stent removal; a  
53 retrospective cohort study. *BMC Infect Dis*. 2019;19(1):303.  
54  
55 89. Parker WP, Tollefson MK, Heins CN, et al. Characterization of perioperative infection risk among  
56 patients undergoing radical cystectomy: Results from the national surgical quality improvement  
57 program. *Urol Oncol*. 2016 Dec;34(12):532.e13-532.e19.  
58  
59  
60

- 1
  - 2
  - 3
  - 4
  - 5
  - 6
  - 7
  - 8
  - 9
  - 10
  - 11
  - 12
  - 13
  - 14
  - 15
  - 16
  - 17
  - 18
  - 19
  - 20
  - 21
  - 22
  - 23
  - 24
  - 25
  - 26
  - 27
  - 28
  - 29
  - 30
  - 31
  - 32
  - 33
  - 34
  - 35
  - 36
  - 37
  - 38
  - 39
  - 40
  - 41
  - 42
  - 43
  - 44
  - 45
  - 46
  - 47
  - 48
  - 49
  - 50
  - 51
  - 52
  - 53
  - 54
  - 55
  - 56
  - 57
  - 58
  - 59
  - 60
90. Pariser JJ, Anderson BB, Pearce SM, et al. The effect of broader, directed antimicrobial prophylaxis including fungal coverage on perioperative infectious complications after radical cystectomy. *Urol Oncol Semin Orig Investig*. 2016;34(3):121.e9-121.e14.
91. Krasnow RE, Mossanen M, Koo S, et al. Prophylactic Antibiotics and Postoperative Complications of Radical Cystectomy: A Population Based Analysis in the United States. *J Urol*. 2017;198(2):297–304.
92. European Association of Urology. Guideline on urological infections [Internet]. [cited 2020 Apr 20]. Available from: <https://uroweb.org/guideline/urological-infections/#3>
93. American Urological Association. Urologic Procedures and Antimicrobial Prophylaxis (2019) [Internet]. [cited 2020 May 11]. Available from: [https://www.auanet.org/guidelines/urologic-procedures-and-antimicrobial-prophylaxis-\(2019\)](https://www.auanet.org/guidelines/urologic-procedures-and-antimicrobial-prophylaxis-(2019))
94. Goossens-Laan CA, Gooiker GA, van Gijn W, et al. A systematic review and meta-analysis of the relationship between hospital/surgeon volume and outcome for radical cystectomy: an update for the ongoing debate. *Eur Urol*. 2011 May;59(5):775–83.
95. Bruins HM, Veskimäe E, Hernández V, et al. The Importance of Hospital and Surgeon Volume as Major Determinants of Morbidity and Mortality After Radical Cystectomy for Bladder Cancer: A Systematic Review and Recommendations by the European Association of Urology Muscle-invasive and Metastatic Bladder. *Eur Urol Oncol*. 2019 Dec 19;
96. Parekh DJ, Reis IM, Castle EP, et al. Robot-assisted radical cystectomy versus open radical cystectomy in patients with bladder cancer ( RAZOR ): an open-label , randomised , phase 3 , non-inferiority trial. *Lancet*. 2018 Jun;391(10139):2525–36.
97. Nix J, Smith A, Kurpad R, Nielsen ME, Wallen EM, Pruthi RS. Prospective Randomized Controlled Trial of Robotic versus Open Radical Cystectomy for Bladder Cancer: Perioperative and Pathologic Results. *Eur Urol*. 2010 Feb;57(2):196–201.
98. Bochner BH, Dalbagni G, Sjoberg DD, et al. Comparing Open Radical Cystectomy and Robot-assisted Laparoscopic Radical Cystectomy: A Randomized Clinical Trial. *Eur Urol*. 2015 Jun;67(6):1042–50.
99. Parekh DJ, Messer J, Fitzgerald J, Ercole B, Svatek R. Perioperative Outcomes and Oncologic Efficacy from a Pilot Prospective Randomized Clinical Trial of Open Versus Robotic Assisted Radical Cystectomy. *J Urol*. 2013 Feb;189(2):474–9.
100. Khan MS, Gan C, Ahmed K, et al. A Single-centre Early Phase Randomised Controlled Three-arm Trial of Open, Robotic, and Laparoscopic Radical Cystectomy (CORAL). *Eur Urol*. 2016 Apr;69(4):613–21.
101. Catto JWF, Khetrpal P, Ambler G, et al. Robot-assisted radical cystectomy with intracorporeal urinary diversion versus open radical cystectomy (iROC): Protocol for a randomised controlled trial with internal feasibility study. *BMJ Open*. 2018;8(8):1–10.
102. Williams SB, Huo J, Chamie K, et al. Underutilization of Radical Cystectomy Among Patients Diagnosed with Clinical Stage T2 Muscle-invasive Bladder Cancer. *Eur Urol Focus*. 2017 Apr;3(2–3):258–64.
103. Ramirez JA, McIntosh AG, Strehlow R, Lawrence VA, Parekh DJ, Svatek RS. Definition, incidence, risk factors, and prevention of paralytic ileus following radical cystectomy: a systematic review. *Eur Urol*. 2013 Oct;64(4):588–97.

- 1  
2  
3  
4 104. Mitropoulos D, Artibani W, Graefen M, et al. Reporting and Grading of Complications After Urologic  
5 Surgical Procedures: An ad hoc EAU Guidelines Panel Assessment and Recommendations. *Eur Urol*.  
6 2012 Feb;61(2):341–9.  
7  
8  
9

10 Legend for Figure 1: Figure 1. PRISMA flowchart  
11  
12  
13  
14  
15  
16  
17  
18  
19  
20  
21  
22  
23  
24  
25  
26  
27  
28  
29  
30  
31  
32  
33  
34  
35  
36  
37  
38  
39  
40  
41  
42  
43  
44  
45  
46  
47  
48  
49  
50  
51  
52  
53  
54  
55  
56  
57  
58  
59  
60

For peer review only

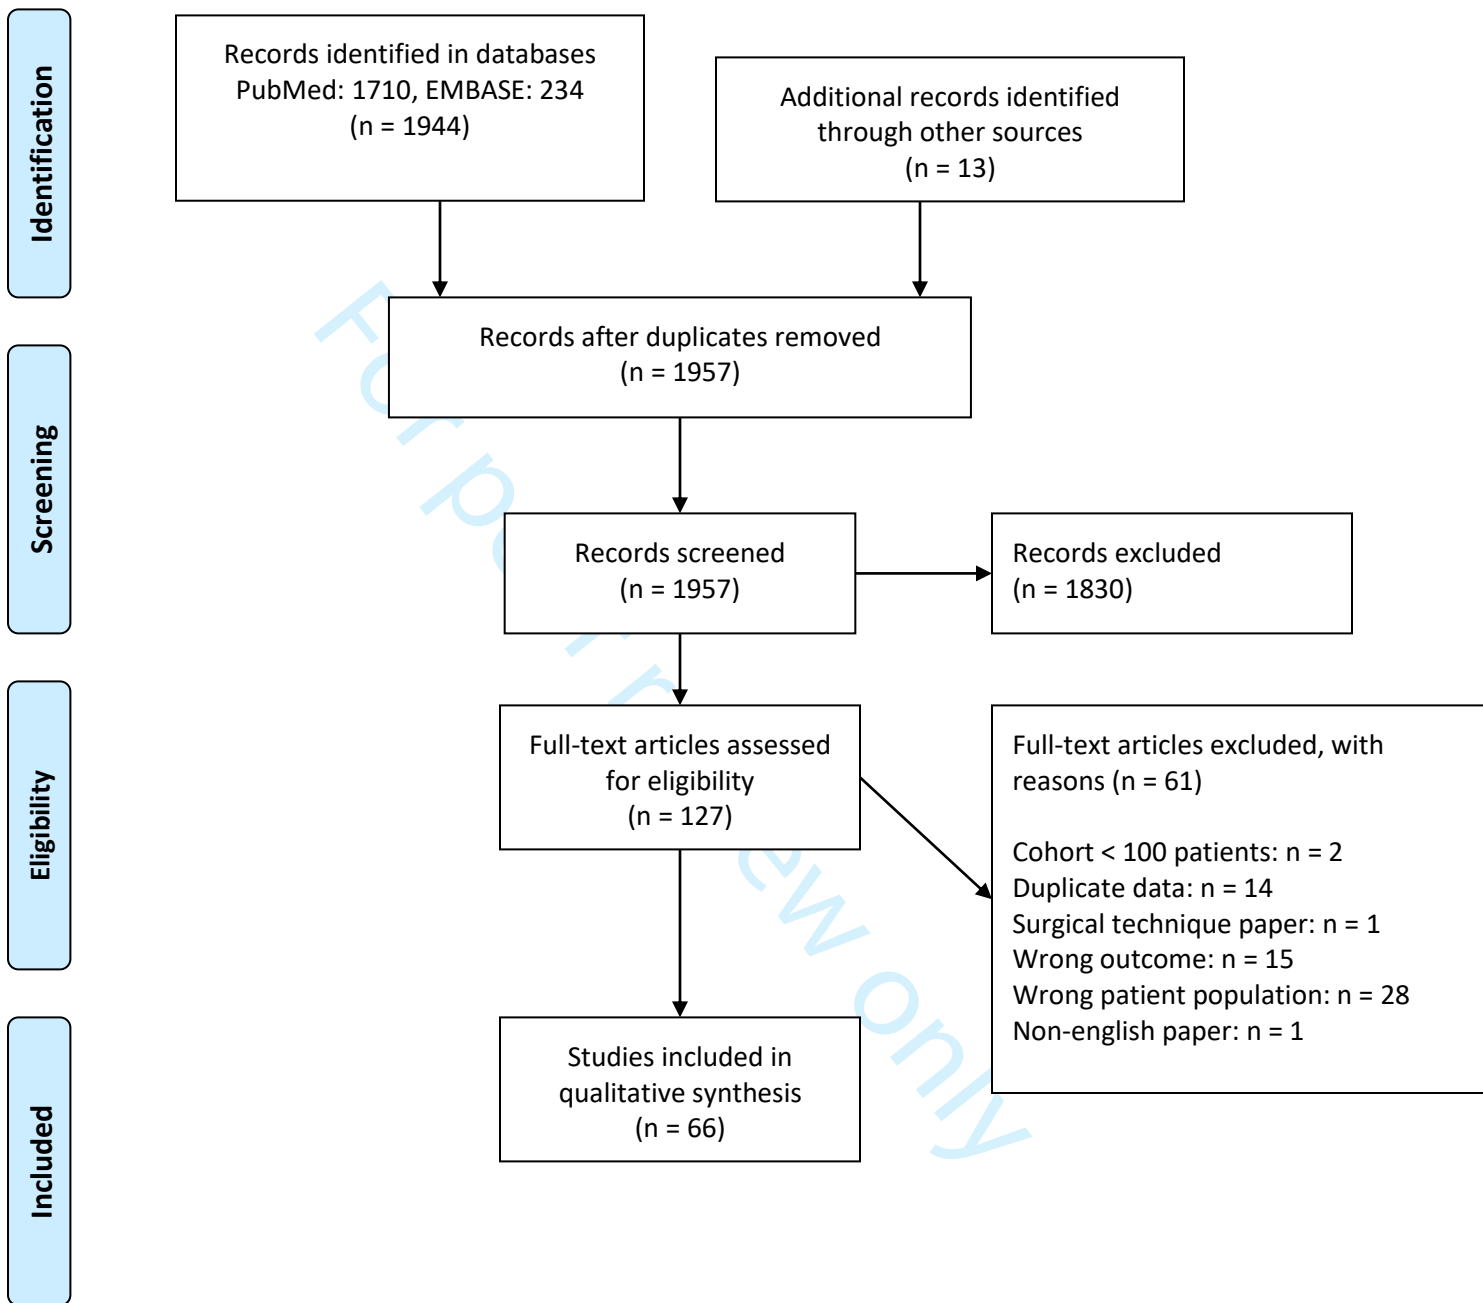

56 From: Moher D, Liberati A, Tetzlaff J, Altman DG, The PRISMA Group (2009). Preferred Reporting Items for Systematic Reviews and Meta-Analyses: The PRISMA Statement. PLoS Med 6(6): e1000097. doi:10.1371/journal.pmed1000097

57 For more information, visit [www.prisma-statement.org](http://www.prisma-statement.org).

58 For peer review only - <http://bmjopen.bmj.com/site/about/guidelines.xhtml>

59

60

## Appendix 1

| Database       | Search string                                                                                                                                                                                                                                                                                                                                                                                                                                                                                                                                                                                                                                                                                                                            |
|----------------|------------------------------------------------------------------------------------------------------------------------------------------------------------------------------------------------------------------------------------------------------------------------------------------------------------------------------------------------------------------------------------------------------------------------------------------------------------------------------------------------------------------------------------------------------------------------------------------------------------------------------------------------------------------------------------------------------------------------------------------|
| PubMed/MEDLINE | <p><b>#1:</b> "urinary bladder neoplasms" [MeSH Terms] OR "urothelial carcinoma"[Title/Abstract]) OR "invasive urothelial bladder carcinomas"[Title/Abstract]) OR "bladder cancer"[Title/Abstract]</p> <p><b>#2:</b> "cystectomy"[Text Word] OR "cystoprostatectomy"[Title/Abstract]</p> <p><b>#3:</b> "postoperative complications"[Text Word] OR "length of stay"[Text Word] OR "complication*" [Title/Abstract] OR "clavien*" [Title/Abstract] OR "reoperation*" [Title/Abstract] OR "mortality" [Title/Abstract]</p> <p><b>#4:</b> #1 AND #2 AND #3</p> <p><b>#5:</b> #4 NOT ("review" [Publication Type] OR "letter" [Publication Type] OR "comment" [Publication Type])</p> <p>Filter: English, humans, publication date 1990-</p> |
| EMBASE         | <p><b>#1:</b> exp bladder cancer/ OR bladder carcinoma.mp/ OR muscle invasive bladder cancer.mp OR bladder cancer.mp OR invasive urothelial cancer.mp OR urothelial carcinoma.mp</p> <p><b>#2:</b> exp cystectomy/ OR cystectomy.mp OR cystoprostatectomy.mp</p> <p><b>#3:</b> exp postoperative complication/ OR exp length of stay/ OR complication/ OR exp reoperation/ OR clavien*.mp OR complication*.mp OR reoperation*.mp OR length of stay.mp OR mortality.mp</p> <p><b>#4:</b> #1 AND #2 AND #3</p> <p>Limits: human, English language, exclude Medline journals</p>                                                                                                                                                            |



## Appendix 2

| Reference                | Number of Martin criteria fulfilled | New Castle-Ottawa Scale score |               |         |
|--------------------------|-------------------------------------|-------------------------------|---------------|---------|
|                          |                                     | Selection                     | Comparability | Outcome |
| Afshar et al.            | NA                                  | ****                          | **            | **      |
| Al-Daghmin et al.        | 5                                   | ****                          | *             | ***     |
| Arora et al.             | 5                                   | ****                          | **            | ***     |
| Björnsson et al.         | 7                                   | ****                          | 0             | ***     |
| Boorjian et al.          | NA                                  | ***                           | **            | ***     |
| Cantiello et al.         | 9                                   | ****                          | 0             | ***     |
| Chang et al.             | 6                                   | ****                          | *             | ***     |
| De Nunzio et al.         | 7                                   | ****                          | **            | **      |
| de Vries et al.          | NA                                  | ****                          | **            | ***     |
| Djaladat et al.          | 9                                   | ****                          | **            | **      |
| Fairey et al.            | 5                                   | ****                          | **            | ***     |
| Flamiatos et al.         | 6                                   | ****                          | *             | ***     |
| Gschliesser et al.       | 5*                                  | ****                          | **            | ***     |
| Hanna et al.             | NA                                  | ****                          | **            | **      |
| Hayn et al.              | 10                                  | ****                          | **            | ***     |
| Hirobe et al.            | 10                                  | ****                          | **            | ***     |
| Hollenbeck et al. (2005) | 5                                   | ****                          | *             | ***     |
| Hollenbeck et al. (2006) | NA                                  | ****                          | **            | ***     |
| Hu et al.                | 4*                                  | ****                          | **            | ***     |
| Jerlström et al.         | 7                                   | ****                          | *             | ***     |
| Johar et al.             | 8                                   | ****                          | **            | ***     |
| Johnson et al.           | 6                                   | ****                          | **            | ***     |

|                        |    |      |    |     |
|------------------------|----|------|----|-----|
| Kader et al.           | 5  | **** | 0  | *** |
| Kanno et al.           | 7  | **** | 0  | *** |
| Khan et al.            | 8  | **** | ** | *** |
| Kim et al.             | 6* | **** | *  | *** |
| Koupparis et al.       | 5  | **** | 0  | *** |
| Kulkarni et al.        | NA | **** | ** | *** |
| Lenfant et al.         | 6  | **** | 0  | *** |
| Leow et al.            | 3  | **** | ** | *** |
| Liedberg et al.        | NA | **** | 0  | *** |
| Lin et al.             | NA | **** | ** | *** |
| Liu et al.             | 5* | **** | 0  | *** |
| Llorente et al. (2017) | 2  | **** | *  | *** |
| Llorente et al. (2020) | 7  | **** | ** | *** |
| Llorente et al. (2020) | NA | **** | ** | *** |
| Lowrance et al.        | 7  | **** | 0  | *** |
| Malavaud et al.        | 6  | **** | 0  | *** |
| Mazzone et al.         | 9  | **** | ** | *** |
| Monn et al.            | 8  | **** | ** | *** |
| Moschini et al.        | 2  | **** | *  | *** |
| Musch et al.           | 7  | **** | 0  | *** |
| Nazmy et al.           | 8  | **** | ** | *** |
| Nazzani et al.         | 4* | **** | ** | *** |
| Nieuwenhuijzen et al.  | 8  | **** | *  | *** |
| Novotny et al. (2007)  | NA | **** | 0  | *** |
| Novotny et al. (2016)  | 5  | **** | ** | *** |

|                  |    |      |    |     |
|------------------|----|------|----|-----|
| Patidar et al.   | 7  | **** | 0  | *** |
| Peyton et al.    | 5  | **** | 0  | *** |
| Porter et al.    | NA | **** | ** | *** |
| Quek et al.      | NA | **** | 0  | *** |
| Roghmann et al.  | 5  | **** | ** | *** |
| Salminen et al.  | 7  | **** | ** | *** |
| Schmid et al.    | 4  | **** | *  | *** |
| Shabsigh et al.  | 10 | **** | ** | *** |
| Styn et al.      | 6  | **** | ** | *** |
| Su et al.        | 5  | **** | 0  | *** |
| Sung et al.      | 9  | **** | *  | *** |
| Svatek et al.    | 9  | **** | *  | *** |
| Takada et al.    | 9  | **** | *  | *** |
| Udovicuch et al. | NA | **** | 0  | *** |
| Wei et al.       | 3  | **** | 0  | *   |
| Wissing et al.   | NA | **** | ** | *** |
| Woldu et al.     | 4  | **** | ** | *** |
| Xylinas et al.   | 7  | **** | 0  | *** |
| Zhang et al.     | 7  | **** | ** | *** |

NA: Not applicable (study not reporting complications). \*Studies have been scored as fulfilling the criteria of "outpatient information included" as this criterium does not apply to the studies with an outcome period including in-house complications only.

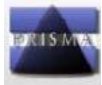

# PRISMA 2009 Checklist

| Section/topic                      | #  | Checklist item                                                                                                                                                                                                                                                                                              | Reported on page # |
|------------------------------------|----|-------------------------------------------------------------------------------------------------------------------------------------------------------------------------------------------------------------------------------------------------------------------------------------------------------------|--------------------|
| <b>TITLE</b>                       |    |                                                                                                                                                                                                                                                                                                             |                    |
| Title                              | 1  | Identify the report as a systematic review, meta-analysis, or both.                                                                                                                                                                                                                                         | 3                  |
| <b>ABSTRACT</b>                    |    |                                                                                                                                                                                                                                                                                                             |                    |
| Structured summary                 | 2  | Provide a structured summary including, as applicable: background; objectives; data sources; study eligibility criteria, participants, and interventions; study appraisal and synthesis methods; results; limitations; conclusions and implications of key findings; systematic review registration number. | 2                  |
| <b>INTRODUCTION</b>                |    |                                                                                                                                                                                                                                                                                                             |                    |
| Rationale                          | 3  | Describe the rationale for the review in the context of what is already known.                                                                                                                                                                                                                              | 3                  |
| Objectives                         | 4  | Provide an explicit statement of questions being addressed with reference to participants, interventions, comparisons, outcomes, and study design (PICOS).                                                                                                                                                  | 3                  |
| <b>METHODS</b>                     |    |                                                                                                                                                                                                                                                                                                             |                    |
| Protocol and registration          | 5  | Indicate if a review protocol exists, if and where it can be accessed (e.g., Web address), and, if available, provide registration information including registration number.                                                                                                                               | 3                  |
| Eligibility criteria               | 6  | Specify study characteristics (e.g., PICOS, length of follow-up) and report characteristics (e.g., years considered, language, publication status) used as criteria for eligibility, giving rationale.                                                                                                      | 3                  |
| Information sources                | 7  | Describe all information sources (e.g., databases with dates of coverage, contact with study authors to identify additional studies) in the search and date last searched.                                                                                                                                  | 3                  |
| Search                             | 8  | Present full electronic search strategy for at least one database, including any limits used, such that it could be repeated.                                                                                                                                                                               | appendix 1         |
| Study selection                    | 9  | State the process for selecting studies (i.e., screening, eligibility, included in systematic review, and, if applicable, included in the meta-analysis).                                                                                                                                                   | 3                  |
| Data collection process            | 10 | Describe method of data extraction from reports (e.g., piloted forms, independently, in duplicate) and any processes for obtaining and confirming data from investigators.                                                                                                                                  | 3                  |
| Data items                         | 11 | List and define all variables for which data were sought (e.g., PICOS, funding sources) and any assumptions and simplifications made.                                                                                                                                                                       | 3                  |
| Risk of bias in individual studies | 12 | Describe methods used for assessing risk of bias of individual studies (including specification of whether this was done at the study or outcome level), and how this information is to be used in any data synthesis.                                                                                      | 4                  |
| Summary measures                   | 13 | State the principal summary measures (e.g., risk ratio, difference in means).                                                                                                                                                                                                                               | 4                  |

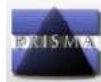

# PRISMA 2009 Checklist

|                      |    |                                                                                                                                                           |    |
|----------------------|----|-----------------------------------------------------------------------------------------------------------------------------------------------------------|----|
| Synthesis of results | 14 | Describe the methods of handling data and combining results of studies, if done, including measures of consistency (e.g., $I^2$ ) for each meta-analysis. | NA |
|----------------------|----|-----------------------------------------------------------------------------------------------------------------------------------------------------------|----|

Page 1 of 2

| Section/topic                 | #  | Checklist item                                                                                                                                                                                           | Reported on page # |
|-------------------------------|----|----------------------------------------------------------------------------------------------------------------------------------------------------------------------------------------------------------|--------------------|
| Risk of bias across studies   | 15 | Specify any assessment of risk of bias that may affect the cumulative evidence (e.g., publication bias, selective reporting within studies).                                                             | 4                  |
| Additional analyses           | 16 | Describe methods of additional analyses (e.g., sensitivity or subgroup analyses, meta-regression), if done, indicating which were pre-specified.                                                         | NA                 |
| <b>RESULTS</b>                |    |                                                                                                                                                                                                          |                    |
| Study selection               | 17 | Give numbers of studies screened, assessed for eligibility, and included in the review, with reasons for exclusions at each stage, ideally with a flow diagram.                                          | 4                  |
| Study characteristics         | 18 | For each study, present characteristics for which data were extracted (e.g., study size, PICOS, follow-up period) and provide the citations.                                                             | 4                  |
| Risk of bias within studies   | 19 | Present data on risk of bias of each study and, if available, any outcome level assessment (see item 12).                                                                                                | 9                  |
| Results of individual studies | 20 | For all outcomes considered (benefits or harms), present, for each study: (a) simple summary data for each intervention group (b) effect estimates and confidence intervals, ideally with a forest plot. | NA                 |
| Synthesis of results          | 21 | Present results of each meta-analysis done, including confidence intervals and measures of consistency.                                                                                                  | NA                 |
| Risk of bias across studies   | 22 | Present results of any assessment of risk of bias across studies (see Item 15).                                                                                                                          | NA                 |
| Additional analysis           | 23 | Give results of additional analyses, if done (e.g., sensitivity or subgroup analyses, meta-regression [see Item 16]).                                                                                    | NA                 |
| <b>DISCUSSION</b>             |    |                                                                                                                                                                                                          |                    |
| Summary of evidence           | 24 | Summarize the main findings including the strength of evidence for each main outcome; consider their relevance to key groups (e.g., healthcare providers, users, and policy makers).                     | 10                 |
| Limitations                   | 25 | Discuss limitations at study and outcome level (e.g., risk of bias), and at review-level (e.g., incomplete retrieval of identified research, reporting bias).                                            | 12                 |
| Conclusions                   | 26 | Provide a general interpretation of the results in the context of other evidence, and implications for future research.                                                                                  | 12                 |
| <b>FUNDING</b>                |    |                                                                                                                                                                                                          |                    |
| Funding                       | 27 | Describe sources of funding for the systematic review and other support (e.g., supply of data); role of funders for the systematic review.                                                               | 13                 |

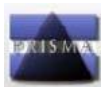

# PRISMA 2009 Checklist

1  
2  
3  
4  
5  
6  
7  
8  
9  
10  
11  
12  
13  
14  
15  
16  
17  
18  
19  
20  
21  
22  
23  
24  
25  
26  
27  
28  
29  
30  
31  
32  
33  
34  
35  
36  
37  
38  
39  
40  
41  
42  
43  
44  
45  
46  
47

*From:* Moher D, Liberati A, Tetzlaff J, Altman DG, The PRISMA Group (2009). Preferred Reporting Items for Systematic Reviews and Meta-Analyses: The PRISMA Statement. PLoS Med 6(7): e1000097. doi:10.1371/journal.pmed1000097

For more information, visit: [www.prisma-statement.org](http://www.prisma-statement.org).

Page 2 of 2

For peer review only
