# Supplementary material for: Short-term morbidity and mortality following radical cystectomy: a systematic review
Source: PubMed Central journal article supplement — BMJ Open. 2021 Apr 14;11(4):e043266. doi: 10.1136/bmjopen-2020-043266 (PMC8054090; doi:10.1136/bmjopen-2020-043266), 2021-04-14
Supplement: bmjopen-2020-043266supp001.pdf [file bmjopen-2020-043266supp001.pdf]

## Appendix 1

| Database       | Search string                                                                                                                                                                                                                                                                                                                                                                                                                                                                                                                                                                                                                                                                                                                    |
|----------------|----------------------------------------------------------------------------------------------------------------------------------------------------------------------------------------------------------------------------------------------------------------------------------------------------------------------------------------------------------------------------------------------------------------------------------------------------------------------------------------------------------------------------------------------------------------------------------------------------------------------------------------------------------------------------------------------------------------------------------|
| PubMed/MEDLINE | <p><b>#1:</b> "urinary bladder neoplasms" [MeSH Terms] OR "urothelial carcinoma"[Title/Abstract] OR "invasive urothelial bladder carcinomas"[Title/Abstract] OR "bladder cancer"[Title/Abstract]</p> <p><b>#2:</b> "cystectomy"[Text Word] OR "cystoprostatectomy"[Title/Abstract]</p> <p><b>#3:</b> "postoperative complications"[Text Word] OR "length of stay"[Text Word] OR "complication*"[Title/Abstract] OR "clavien*"[Title/Abstract] OR "reoperation*"[Title/Abstract] OR "mortality"[Title/Abstract]</p> <p><b>#4:</b> #1 AND #2 AND #3</p> <p><b>#5:</b> #4 NOT ("review" [Publication Type] OR "letter"[Publication Type] OR "comment"[Publication Type])</p> <p>Filter: English, humans, publication date 1990-</p> |
| EMBASE         | <p><b>#1:</b> exp bladder cancer/ OR bladder carcinoma.mp/ OR muscle invasive bladder cancer.mp OR bladder cancer.mp OR invasive urothelial cancer.mp OR urothelial carcinoma.mp</p> <p><b>#2:</b> exp cystectomy/ OR cystectomy.mp OR cystoprostatectomy.mp</p> <p><b>#3:</b> exp postoperative complication/ OR exp length of stay/ OR complication/ OR exp reoperation/ OR clavien*.mp OR complication*.mp OR reoperation*.mp OR length of stay.mp OR mortality.mp</p> <p><b>#4:</b> #1 AND #2 AND #3</p> <p>Limits: human, English language, exclude Medline journals</p>                                                                                                                                                    |
