# Supplementary material for: Short-term morbidity and mortality following radical cystectomy: a systematic review
Source: PubMed Central journal article supplement — BMJ Open. 2021 Apr 14;11(4):e043266. doi: 10.1136/bmjopen-2020-043266 (PMC8054090; doi:10.1136/bmjopen-2020-043266), 2021-04-14
Supplement: bmjopen-2020-043266supp002.pdf [file bmjopen-2020-043266supp002.pdf]

## Appendix 2

| Reference                | Number of Martin criteria fulfilled | New Castle-Ottawa Scale score |               |         |
|--------------------------|-------------------------------------|-------------------------------|---------------|---------|
|                          |                                     | Selection                     | Comparability | Outcome |
| Afshar et al.            | NA                                  | ****                          | **            | **      |
| Al-Daghmin et al.        | 5                                   | ****                          | *             | ***     |
| Arora et al.             | 5                                   | ****                          | **            | ***     |
| Björnsson et al.         | 7                                   | ****                          | 0             | ***     |
| Boorjian et al.          | NA                                  | ***                           | **            | ***     |
| Cantiello et al.         | 9                                   | ****                          | 0             | ***     |
| Chang et al.             | 6                                   | ****                          | *             | ***     |
| De Nunzio et al.         | 7                                   | ****                          | **            | **      |
| de Vries et al.          | NA                                  | ****                          | **            | ***     |
| Djaladat et al.          | 9                                   | ****                          | **            | **      |
| Fairey et al.            | 5                                   | ****                          | **            | ***     |
| Flamiatos et al.         | 6                                   | ****                          | *             | ***     |
| Gschliesser et al.       | 5*                                  | ****                          | **            | ***     |
| Hanna et al.             | NA                                  | ****                          | **            | **      |
| Hayn et al.              | 10                                  | ****                          | **            | ***     |
| Hirobe et al.            | 10                                  | ****                          | **            | ***     |
| Hollenbeck et al. (2005) | 5                                   | ****                          | *             | ***     |
| Hollenbeck et al. (2006) | NA                                  | ****                          | **            | ***     |
| Hu et al.                | 4*                                  | ****                          | **            | ***     |
| Jerlström et al.         | 7                                   | ****                          | *             | ***     |
| Johar et al.             | 8                                   | ****                          | **            | ***     |
| Johnson et al.           | 6                                   | ****                          | **            | ***     |

|                        |    |      |    |     |
|------------------------|----|------|----|-----|
| Kader et al.           | 5  | **** | 0  | *** |
| Kanno et al.           | 7  | **** | 0  | *** |
| Khan et al.            | 8  | **** | ** | *** |
| Kim et al.             | 6* | **** | *  | *** |
| Koupparis et al.       | 5  | **** | 0  | *** |
| Kulkarni et al.        | NA | **** | ** | *** |
| Lenfant et al.         | 6  | **** | 0  | *** |
| Leow et al.            | 3  | **** | ** | *** |
| Liedberg et al.        | NA | **** | 0  | *** |
| Lin et al.             | NA | **** | ** | *** |
| Liu et al.             | 5* | **** | 0  | *** |
| Llorente et al. (2017) | 2  | **** | *  | *** |
| Llorente et al. (2020) | 7  | **** | ** | *** |
| Llorente et al. (2020) | NA | **** | ** | *** |
| Lowrance et al.        | 7  | **** | 0  | *** |
| Malavaud et al.        | 6  | **** | 0  | *** |
| Mazzone et al.         | 9  | **** | ** | *** |
| Monn et al.            | 8  | **** | ** | *** |
| Moschini et al.        | 2  | **** | *  | *** |
| Musch et al.           | 7  | **** | 0  | *** |
| Nazmy et al.           | 8  | **** | ** | *** |
| Nazzani et al.         | 4* | **** | ** | *** |
| Nieuwenhuijzen et al.  | 8  | **** | *  | *** |
| Novotny et al. (2007)  | NA | **** | 0  | *** |
| Novotny et al. (2016)  | 5  | **** | ** | *** |

|                  |    |      |    |     |
|------------------|----|------|----|-----|
| Patidar et al.   | 7  | **** | 0  | *** |
| Peyton et al.    | 5  | **** | 0  | *** |
| Porter et al.    | NA | **** | ** | *** |
| Quek et al.      | NA | **** | 0  | *** |
| Roghmann et al.  | 5  | **** | ** | *** |
| Salminen et al.  | 7  | **** | ** | *** |
| Schmid et al.    | 4  | **** | *  | *** |
| Shabsigh et al.  | 10 | **** | ** | *** |
| Styn et al.      | 6  | **** | ** | *** |
| Su et al.        | 5  | **** | 0  | *** |
| Sung et al.      | 9  | **** | *  | *** |
| Svatek et al.    | 9  | **** | *  | *** |
| Takada et al.    | 9  | **** | *  | *** |
| Udovicuch et al. | NA | **** | 0  | *** |
| Wei et al.       | 3  | **** | 0  | *   |
| Wissing et al.   | NA | **** | ** | *** |
| Woldu et al.     | 4  | **** | ** | *** |
| Xylinas et al.   | 7  | **** | 0  | *** |
| Zhang et al.     | 7  | **** | ** | *** |

NA: Not applicable (study not reporting complications). \*Studies have been scored as fulfilling the criteria of "outpatient information included" as this criterium does not apply to the studies with an outcome period including in-house complications only.
